## Artificial Selection on Microbiomes to Confer Salt-Tolerance to Plants

Mueller et al, bioRxiv, Draft 8Nov2019; please email comments to: [umueller@austin.utexas.edu](mailto:umueller@austin.utexas.edu)

### 1 Artificial Microbiome-Selection to Engineer Microbiomes That Confer Salt-Tolerance to Plants

2  
3 Ulrich G Mueller<sup>1,\*</sup>, Thomas E Juenger<sup>1</sup>, Melissa R Kardish<sup>1,2</sup>, Alexis L Carlson<sup>1</sup>, Kathleen Burns<sup>1</sup>, Joseph  
4 A Edwards<sup>1</sup>, Chad C Smith<sup>1</sup>, Chi-Chun Fang<sup>1</sup>, David L Des Marais<sup>1,2</sup>

5 <sup>1</sup> Department of Integrative Biology, University of Texas at Austin, 1 University Station #C0990, Austin  
6 TX 78712, USA

7 <sup>2</sup> Center for Population Biology, University of California, Davis, CA, USA

8 <sup>3</sup> Department of Civil & Environmental Engineering, Massachusetts Institute of Technology, 15 Vassar  
9 Street, Cambridge, MA, 02139

10 \* Corresponding author: Ulrich G. Mueller, [umueller@austin.utexas.edu](mailto:umueller@austin.utexas.edu)

11  
12 **Abstract:** We develop a method to artificially select for rhizosphere microbiomes that confer salt-tolerance  
13 to the model grass *Brachypodium distachyon*. We differentially propagate microbiomes within the back-  
14 ground of a non-evolving, highly-inbred plant population, and therefore only microbiomes evolve in our  
15 experiment, but not the plants. To optimize methods, we conceptualize artificial microbiome-selection as a  
16 special case of *indirect selection*: We do not measure microbiome properties directly, but we use host per-  
17 formance (e.g., biomass; seed set) as an indicator to infer association with rhizosphere microbiomes that  
18 confer salt-tolerance to a plant. We previously called this indirect-selection scheme *host-mediated indirect*  
19 *selection on microbiomes* (Mueller & Sachs 2015). Our methods aim to maximize evolutionary changes  
20 due to differential microbiome-propagation, while minimizing some (but not all) ecological processes af-  
21 fecting microbiome composition. Specifically, our methods aim to maximize microbiome perpetuation be-  
22 tween selection-cycles and maximize response to artificial microbiome-selection by (a) controlling micro-  
23 biome assembly when inoculating seeds at the beginning of each selection cycle; (b) using low-carbon soil  
24 to enhance host-control mediated by carbon secretions of plants during initial microbiome assembly and  
25 subsequent microbiome persistence; (c) fractionating microbiomes before transfer between plants to per-  
26 petuate and select only on bacterial and viral (but not fungal) microbiome components; and (d) ramping of  
27 salt-stress between selection-cycles to minimize the chance of over-stressing plants. Our selection protocol  
28 generates microbiomes that enhance plant fitness after only 1-3 rounds of artificial selection on rhizosphere  
29 microbiomes. Relative to fallow-soil control treatments, artificially-selected microbiomes increase plant  
30 fitness by 75% under sodium-sulfate stress, and by 38% under aluminum-sulfate stress. Relative to null  
31 control treatments, artificially-selected microbiomes increase plant fitness by 13% under sodium-sulfate  
32 stress, and by 12% under aluminum-sulfate stress. When testing microbiomes after nine rounds of differ-  
33 ential microbiome propagation, the effect of bacterial microbiomes selected to confer tolerance to sodium-  
34 sulfate stress appears specific (these microbiomes do not confer tolerance to aluminum-sulfate stress), but  
35 the effect of microbiomes selected to confer tolerance to aluminum-sulfate stress appears non-specific (se-  
36 lected microbiomes ameliorate both sodium- and aluminum-sulfate stresses). Complementary metagenomic  
37 analyses of the artificially selected microbiomes will help elucidate metabolic properties of microbiomes  
38 that confer specific versus non-specific salt-tolerance to plants.

### 39 INTRODUCTION

40  
41 A challenge in plant-microbiome research is engineering of microbiomes with specific and lasting benefi-  
42 cial effects on plants. These difficulties of microbiome engineering derive from several interrelated factors,  
43 including transitions in microbiome function during plant ontogeny, and the sheer complexity of microbi-  
44 ome communities, such as the hyperdiverse rhizosphere or phyllosphere microbiomes containing countless  
45 fungal, bacterial, and viral components (Bulgarelli *et al* 2013; Pfeiffer *et al* 2013; Roossinck 2015). Even  
46 when beneficial microbiomes can be assembled experimentally to generate specific microbiome functions  
47 that benefit a plant, microbiomes are often ecologically unstable and undergo turnover (i.e., microbiome  
48 communities change over time), for example when new microbes immigrate into microbiomes, when ben-  
49 efiticial microbes are lost from microbiomes, or when beneficial microbes evolve under microbe-microbe  
50 competition new properties that are detrimental to a host plant.

## Artificial Selection on Microbiomes to Confer Salt-Tolerance to Plants

Mueller et al, bioRxiv, Draft 8Nov2019; please email comments to: umueller@austin.utexas.edu

51 One strategy to engineer sustainable beneficial microbiome-function uses repeated cycles of differential microbiome-propagation to perpetuate between hosts only those microbiomes that have the most desired fitness effects on a host (Figure 1). Such differential propagation of microbiomes between hosts can therefore artificially selects for microbiome components that best mediate, for example, stresses that impact host fitness (Swenson *et al* 2000; Williams & Lenton 2007; Mueller & Sachs 2015). Only two published studies have used this approach so far (Swenson *et al* 2000; Panke-Buisse *et al* 2015). Both studies tried to select on rhizosphere microbiomes of the plant *Arabidopsis thaliana*, and both studies needed more than 10 selection-cycles to generate an overall weak and highly variable phenotypic response to microbiome-selection (e.g., increase in above-ground biomass of plants by about 10%; Swenson *et al* 2000). We here improve this differential microbiome-propagation method to artificially select for rhizosphere microbiomes that confer salt-tolerance to the model grass *Brachypodium distachyon* (Figures 1 & 2). Specifically, we build on the original methods of Swenson *et al* (2000) by modifying experimental steps that are critical to improve (i) microbiome perpetuation and (ii) response to artificial microbiome-selection. These experimental improvements include controlling microbiome assembly when inoculating seeds; low-carbon soil to enhance host-control exerted by seedlings during initial microbiome assembly and early plant growth; harvesting and perpetuating microbiomes that are in close physical contact with plants; short-cycling of microbiome-generations to select for microbiomes that benefit seedling growth; microbiome-fractionation to eliminate possible transfer of pathogenic fungi; ramping of salt-stress between selection-cycles to minimize the chance of either under-stressing or over-stressing plants.

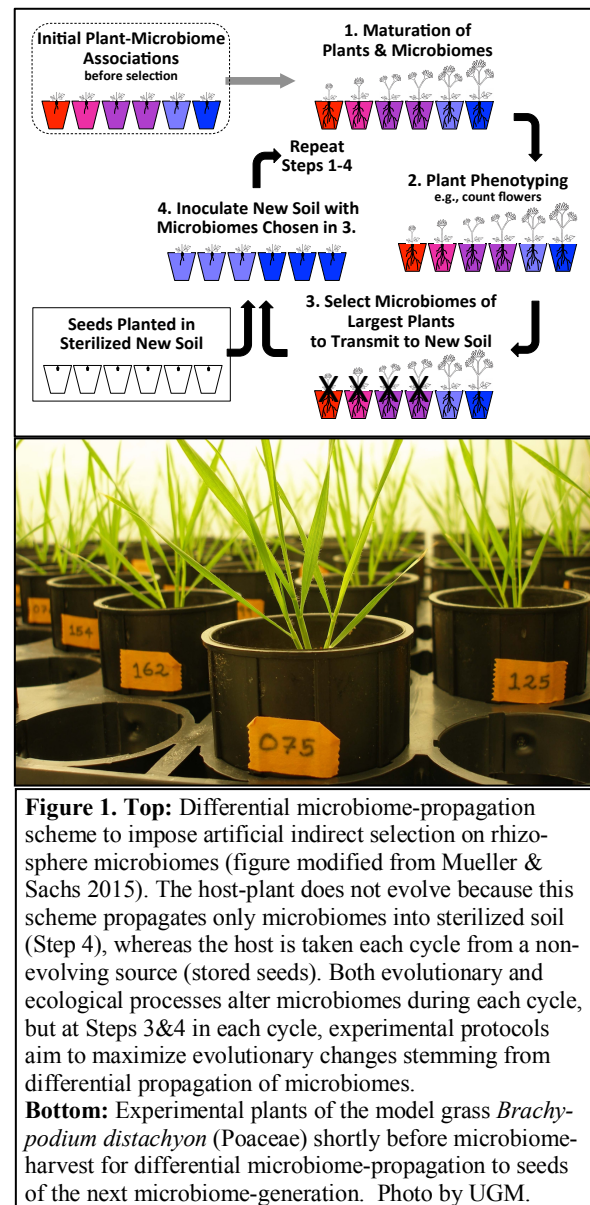

**Figure 1. Top:** Differential microbiome-propagation scheme to impose artificial indirect selection on rhizosphere microbiomes (figure modified from Mueller & Sachs 2015). The host-plant does not evolve because this scheme propagates only microbiomes into sterilized soil (Step 4), whereas the host is taken each cycle from a non-evolving source (stored seeds). Both evolutionary and ecological processes alter microbiomes during each cycle, but at Steps 3&4 in each cycle, experimental protocols aim to maximize evolutionary changes stemming from differential propagation of microbiomes. **Bottom:** Experimental plants of the model grass *Brachypodium distachyon* (Poaceae) shortly before microbiome-harvest for differential microbiome-propagation to seeds of the next microbiome-generation. Photo by UGM.

88 **The Logic of Host-Mediated Indirect Artificial Selection on Microbiomes:** To optimize microbiome-selection experiments, we found it useful to conceptualize the selection process within a host-focused quantitative-genetic framework (Mueller & Sachs 2015), rather than within a multi-level selection framework preferred by Swenson *et al* (2000; “artificial ecosystem selection”). Both frameworks capture the same processes, but a host-focused quantitative-genetic framework is more useful to identify factors that can be manipulated to increase efficacy of microbiome-selection (Mueller & Sachs 2015). First, because microbiome-selection aims to shape a fitness component of the host-plant (e.g., growth rate, stress tolerance, disease resistance), and because it is typically easier to measure plant phenotypes rather than measure microbiome properties, *selection is indirect*: Microbiomes are not measured directly, but microbiomes are evaluated indirectly by measuring host performance. Indirect selection is an established breeding technique that is often used when the indirectly-selected trait is difficult or costly to measure (Falconer & Mackay 1996), as is the case also for microbiome properties, compared to the ease of measuring a host phenotype that is dependent on microbiome properties. The efficacy of indirect selection depends on correlations between microbiome properties and host trait, and indirect microbiome-selection should therefore be more efficient

## Artificial Selection on Microbiomes to Confer Salt-Tolerance to Plants

Mueller et al, bioRxiv, Draft 8Nov2019; please email comments to: umueller@austin.utexas.edu

102 if such correlations can be maximized experimentally, for example by controlling ecological priority-effects  
103 during initial microbiome assembly, or by increasing host-control over microbiome assembly and microbi-  
104 ome persistence. Second, because a typical host experienced a long history of evolution to monitor and  
105 manipulate its microbiomes (a process called *host control*; Sachs *et al* 2004, 2010; Kiers *et al* 2007; Berg  
106 & Smalla 2009; Bright & Bulgheresi 2010; Hillman & Goodrich-Blair 2016; Lareen *et al* 2016; Foster *et*  
107 *al* 2017), indirect microbiome-selection uses the host as a kind of “thermostat” to help gauge and adjust the  
108 “temperature” of its microbiomes, then propagate desired microbiomes between hosts (Mueller & Sachs  
109 2015; Figure 1). Based on theory (Foster & Wenseleers 2006; Williams & Lenton 2007; Fitzpatrick 2014;  
110 Mueller & Sachs 2015), such *host-mediated indirect* selection on microbiomes can be easier than direct  
111 selection on microbiomes, particularly with hosts that exert strong host-control over assembly and stability  
112 of their microbiomes (Scheuring & Yu 2012; Coyte *et al* 2015; Mueller & Sachs 2015). Third, as in Swen-  
113 son *et al* (2000), we used an inbred strain of a plant-host (here, *B. distachyon* genotype Bd3-1) to ensure  
114 constancy of the host-genetic environment within and between selection-cycles, such that microbiomes  
115 evolve in a specific plant-genotype background; we have previously called this method *one-sided selection*  
116 (Mueller & Sachs 2015) because only the microbiomes change between propagation cycles, whereas the  
117 host is taken each cycle from stored, inbred stock (Figure 1). The host therefore cannot evolve and micro-  
118 biome-selection proceeds within the background of a genetically constant and homogenous host.

119  
120 **Definition of Microbiome Engineering & Microbiome Selection:** Microbiome engineering by means of  
121 differential microbiome propagation (Figure 1) alters microbiomes through both ecological and evolution-  
122 ary processes. Ecological processes include changes in community diversity, relative species abundances,  
123 or structure of microbe-microbe or microbe-plant interaction networks. Evolutionary processes include ex-  
124 tinction of specific microbiome members; allele frequency changes, mutation, or gene transfer between  
125 microbes; and differential persistence of microbiome components when differentially propagating micro-  
126 biomes at each selection cycle. These processes can be interdependent (e.g., in the case of eco-evolutionary  
127 feedbacks; Strauss 2014; Theis *et al* 2016; De Meester *et al* 2019), and some processes can be called either  
128 ecological or evolutionary (e.g., loss of a microbe from a microbiome community can be viewed as evolu-  
129 tionary extinction or as a result of ecological competition), but for the design of an efficient microbiome-  
130 selection protocol, it is useful to think about ecological processes separately from evolutionary processes.  
131 Microbiome-selection protocols aim to maximize evolutionary changes stemming from differential micro-  
132 biomes propagation (Steps 3&4 in Figure 1), for example by optimizing microbiome inheritance during  
133 microbiome transfers between hosts, or by optimizing microbiome re-assembly after such transfers (e.g.,  
134 by facilitating ecological priority effects at initial host inoculation). Although both evolutionary and eco-  
135 logical processes alter microbiomes during each propagation cycle (Figure 1), as a shorthand, we refer here  
136 to the combined evolutionary and ecological changes resulting from host-mediated indirect artificial selec-  
137 tion on microbiomes as ‘microbiome response’ due to ‘microbiome selection’.

## 138 METHODS

139  
140 We describe all experimental steps and analyses in great detail in the Supplemental Information, and sum-  
141 marize here the basic experimental approach:

142 **Maximizing microbiome perpetuation:** To select for microbiomes that confer salt-tolerance to plants, we  
143 used a differential host-microbiome co-propagation scheme as described in Swenson *et al* (2000), Mueller  
144 *et al* (2005), and Mueller & Sachs (2015). Because both evolutionary and ecological processes alter micro-  
145 biomes during and between selection-cycles (i.e., microbiome-generations), we designed a protocol that  
146 improved on these earlier selection-schemes by (i) maximizing evolutionary microbiome changes stem-  
147 ming from differential propagation of whole microbiomes occurring at Step 3 in Figure 1, while (ii) mini-  
148 mizing some, but not all, ecological microbiome changes that can occur at any of the steps in the selection  
149 cycle (e.g., we tried to minimize uncontrolled microbe-community turnover). In essence, our protocol  
150 aimed to maximize microbiome-perpetuation (i.e., maximize microbiome-inheritance of key microbes) and  
151 thus enhance efficacy of artificial indirect selection on microbiomes. To increase microbiome-inheritance,

## Artificial Selection on Microbiomes to Confer Salt-Tolerance to Plants

Mueller et al, bioRxiv, Draft 8Nov2019; please email comments to: umueller@austin.utexas.edu

152 we added protocol steps of established techniques, most importantly (i) facilitation of ecological priority-  
153 effects during initial microbiome assembly (Fierer *et al* 2012; Scheuring & Yu 2012), thus increasing mi-  
154 crobiome-inheritance by controlling in each selection-cycle the initial recruitment of symbiotic bacteria  
155 into rhizosphere microbiomes of seedlings; and (ii) low-carbon soil to enhance carbon-dependent host-  
156 control of microbiome-assembly and microbiome-persistence (Bais *et al* 2006; Bulgarelli *et al* 2013;  
157 Mueller & Sachs 2015; Coyte *et al* 2015; Tkacz & Poole 2015). Theory predicts that any experimental steps  
158 increasing fidelity of microbiome-perpetuation from mother-microbiome to offspring-microbiome should  
159 increase the efficacy of host-mediated microbiome selection (Mueller & Sachs 2015; Zeng *et al* 2017).

160 **Maximizing microbiome heritability:** In each microbiome-propagation cycle (microbiome generation), we  
161 inoculated surface-sterilized seeds taken from non-evolving stock (inbred strain Bd3-1 of the grass *Brachy-*  
162 *podium distachyon*; Vogel *et al* 2006; Garvin *et al* 2008; Vogel & Bragg 2009; Brkljacic *et al* 2011), using  
163 rhizosphere bacteria harvested from roots of those plants within each selection line that exhibited the great-  
164 est above-ground biomass (Figure 1). Microbiome-selection within the genetic background of an invariant  
165 (i.e., highly inbred) plant genotype increases *microbiome heritability*, defined here as the proportion of  
166 overall variation in plant phenotype that can be attributed to differences in microbiomes between plants.  
167 By keeping plant genotype invariant, microbiome heritability increases because a greater proportion of the  
168 overall plant-phenotypic variation in a selection line can be attributed to differences in microbiome-associ-  
169 ation. This increases an experimenter's ability to identify association with a beneficial microbiome (Swen-  
170 son *et al* 2000). In essence, microbiome selection within the background of a single, homogenous plant-  
171 genotype increases reliability of the host-phenotype as indicator of microbiome effects, and thus should  
172 increase the efficiency of indirect selection on microbiomes.

173 **Harvesting rhizosphere microbiomes & selection scheme:** Each selection line consisted of a population of  
174 eight replicate plants, and each selection treatment had five replicate selection lines (i.e., 40 plants total per  
175 treatment). To phenotype plants on the day of microbiome harvesting, we judged above-ground growth  
176 visually by placing all eight plants of the same selection line in ascending order next to each other (Figure  
177 S3), then choosing the two largest plants for microbiome harvest. For all plants, we cut plants at soil level,  
178 then stored the above-ground portion in an envelope for drying and subsequent weighing. For each plant  
179 chosen for microbiome harvest, we extracted the entire root system from the soil, then harvested rhizosphere  
180 microbiomes immediately to minimize microbiome changes in the absence of plant-control in the rhizo-  
181 sphere. Entire root structures could be extracted whole because of a granular soil texture (Profile Porous  
182 Ceramic soil), with some loss of fine roots. Because we were interested in harvesting microbiomes that  
183 were in close physical association with roots, we discarded any soil adhering loosely to roots, leaving a root  
184 system with few firmly attached soil particles. We combined the root systems from the two best-growing  
185 plants of the same selection line, and harvested their mixed rhizosphere microbiomes by immersing and  
186 gently shaking the roots in the same salt-nutrient buffer that we used also to hydrate soils (details in Sup-  
187 plemental Information). Combining root systems from the two best-growing plants generated a so-called  
188 *mixed microbiome* harvested from two 'mother rhizospheres', which we then transferred within the same  
189 selection line to all eight 'offspring plants' (i.e., germinating seeds) of the next microbiome generation  
190 (Figure 1).

191 **Microbiome fractionation with size-selecting filters before microbiome propagation:** To simplify meta-  
192 genomic analyses from propagated microbiomes, we used size-selecting filters (Bakken & Olsen 1987;  
193 Mueller & Sachs 2015) to filter microbiomes harvested from rhizospheres of 'mother-plants', thus captur-  
194 ing only bacteria (and possibly also viruses) for microbiome propagation to the next microbiome-genera-  
195 tion, but eliminating from propagation between microbiome-generations any larger-celled soil-organisms  
196 with filters (i.e., we excluded filamentous fungi, protozoa, algae, mites, nematodes, etc.). This fractionation  
197 step distinguishes our methods from those of Swenson *et al* (2000) and Panke-Buisse *et al* (2015), both of  
198 which used 'whole-community' propagation to transfer between generations all organism living in soil,  
199 including the fungi, protozoa, algae, and multicellular organisms that were excluded from propagation  
200 through size-selecting filtering in our experiment.

201 **Salt-stress treatments and experimental contrasts:** Using different selection-lines, we selected for benefi-  
202 cial microbiomes conferring salt-tolerance to either sodium-sulfate [Na<sub>2</sub>SO<sub>4</sub>] or to aluminum-sulfate

## Artificial Selection on Microbiomes to Confer Salt-Tolerance to Plants

Mueller et al, bioRxiv, Draft 8Nov2019; please email comments to: umueller@austin.utexas.edu

203 [Al<sub>2</sub>(SO<sub>4</sub>)<sub>3</sub>]. Such an experimental contrast involving two main treatments (i.e., the two salt stresses) en-  
204 ables an experimenter to compare evolving microbiomes using metagenomic time-series analyses, as well  
205 as to identify candidate microbes (indicator taxa) and microbial consortia that differ between sodium- and  
206 aluminum treatments and that may therefore confer specific salt-tolerance to plants.

207 **Control treatments:** To evaluate the effects of selection treatments, we included two non-selection control  
208 treatments. In *Fallow-Soil Microbiome-Propagation Control*, we harvested microbiomes from fallow soil  
209 (no plant growing in a pot; microbiomes are harvested from root-free soil, collected at the same depth of  
210 roots in pots with plants), then propagated the harvested microbiomes to sterile fallow soil of the next  
211 microbiome-generation. In *Null Control*, we did not inoculate germinating seeds with any microbiomes,  
212 but microbes could enter soil from air (i.e., microbial "rain"), as was the case also for all other treatments.

213 **Number of selection cycles (microbiome generations):** Our complete experiment involved one baseline  
214 Generation (Generation 0, Table S1a) to establish initial microbiomes in replicate pots; 8 rounds of micro-  
215 biome-selection (i.e., differential microbiome-propagation) (Generations 1-8, Table S1b); and one final,  
216 ninth round (Generation 9, Table S1c) to evaluate the effects of the engineered microbiomes on flower-  
217 production and seed-set, for a total of 10 microbiome-generations.

218 **Ramping of salt stress:** We increased salt stresses gradually during the selection experiment, by (i) increas-  
219 ing between generations the molarity of the water used to hydrate dry soil before soil-sterilization and  
220 planting (Table S2); and (ii) increasing correspondingly between generations also the molarity of the water  
221 used to hydrate pots at regular intervals (Table S3). Over the 10 generations, sodium-sulfate molarity in the  
222 sodium-stress treatments increased from 20 millimolar (mM) to 60 mM, and aluminum-sulfate molarity in  
223 the aluminum-stress treatments increased from 0.02 mM to 1.5 mM (Tables S2 & S3). The salt stresses of  
224 the baseline generation were chosen because, in pilot experiments, these stresses caused minimal delays in  
225 germination and growth compared to unstressed control plants. The logic of ramping and adjusting salt-  
226 stresses stepwise between selection cycles are explained further in the Supplemental Information.

227

228

229

## RESULTS

### 230 Artificially-Selected Microbiomes Confer Increased Salt-Tolerance to Plants

231 Figure 2a-d shows the changes in relative plant-fitness (above-ground dry biomass) during 8 rounds of  
232 differential microbiome propagation. Relative to Fallow-Soil Control and Null Control treatments, selected  
233 microbiomes confer increased salt-tolerance to plants after only 1-3 selection-cycles, for both microbiomes  
234 selected to confer tolerance to sodium-stress (Figure 2a&b) or to aluminum-stress (Figure 2c&d). Relative  
235 to Fallow-Soil Controls, artificially selected microbiomes increase plant fitness by 75% under sodium-sul-  
236 fate stress ( $p < 0.001$ ), and by 38% under aluminum-sulfate stress ( $p < 0.001$ ). Relative to Null Control plants,  
237 artificially selected microbiomes increase plant fitness by 13% under sodium-sulfate stress, and by 12%  
238 under aluminum-sulfate stress. Although repeated rounds of differential microbiome-propagation improved  
239 plant fitness between successive microbiome-generations (particularly in the Null Controls; Figure 2b&d),  
240 interactions between treatment and generation were not statistically significant (see Supplemental Infor-  
241 mation). This implies that fitness-enhancing effects of microbiomes from selection-lines therefore were  
242 realized after one or a few rounds of differential microbiome-propagation (e.g., Figure 2b&d), and there  
243 was insufficient statistical support that, under the gradually increasing salt stress, any additional rounds  
244 further resulted in greater plant biomass of selection-lines relative to control-lines. However, because plants  
245 were exposed to greater salt stresses in later selection cycles (see ramping of salt stress, Table S2), the  
246 selected microbiomes must have had correspondingly greater beneficial effects on the stressed plants. Se-  
247 lected microbiomes of later generations therefore helped plants tolerate greater salt stresses to allow plants  
248 grow the same biomass as plants in somewhat earlier generations experiencing somewhat lesser salt stress.

249

250 The phenotypic effect on plants due to the evolving microbiomes fluctuated during the eight rounds of  
251 differential microbiome propagation (Figures 2a-d; Table S1). Such fluctuations can occur in typical artifi-  
252 cial selection experiments (e.g., chapters 10, 12 & 18 in Garland & Rose 2009), but fluctuations may be

## Artificial Selection on Microbiomes to Confer Salt-Tolerance to Plants

Mueller et al, bioRxiv, Draft 8Nov2019; please email comments to: umueller@austin.utexas.edu

253 more pronounced when artificially selecting on microbiomes (Blouin *et al* 2015) because additional factors  
 254 can contribute to between-generation fluctuations. Specifically, across the eight selection cycles in our ex-  
 255 periment, the observed fluctuations could have been due to (i) uncontrolled humidity changes and correlated  
 256 humidity-dependent water-needs of plants (humidity was not controlled in our growth chamber), conse-  
 257 quently changing the effective salt-stresses; (ii) the strong ramping of salt-stress during the first five selec-  
 258 tion-cycles, possibly resulting in excessively stressed plants in Generations 4 & 5 (see discussion in Sup-  
 259 plemental Information; Tables S2 & S3); (iii) random microbiome changes ("microbiome drift") and con-  
 260 sequently random microbe-microbe interactions; or (iv) other such uncontrolled factors. The fluctuations  
 261 in plant fitness are most prominent during the first five selection-cycles (Figure 2a-d) when we increased  
 262 salt-stress 2-fold to 5-fold between each generation and when humidity varied most (see Supplemental  
 263 Information), whereas fluctuations were less pronounced during the last three generations when we changed  
 264 salt-stress only minimally and humidity was relatively stable (Tables S2 & S3). These observations seem  
 265 consistent with known responses of *B. distachyon* to environmental stresses (De Marais & Juenger 2011)  
 266 predicting that artificial selection on microbiomes conferring salt-tolerance to plants should be most effi-  
 267 cient under experimental conditions that rigorously control soil moisture, salt-stress, humidity, and plant  
 268 transpiration.  
 269

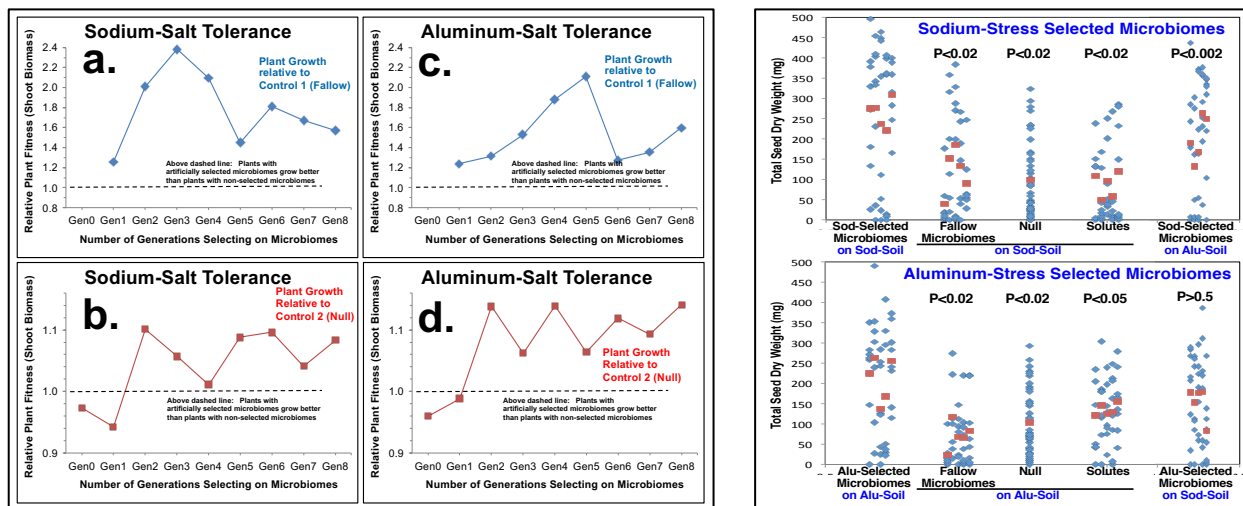

270 **Figure 2. Host-mediated artificial selection on microbiomes** to confer salt-tolerance to the grass *Brachypodium*  
 271 *distachyon*. **Left:** Microbiomes were propagated for 8 selection cycles (generations = Gen), using the microbiome  
 272 propagation scheme in Figure 1. Two salt stresses (sodium-sulfate vs. aluminum-sulfate) are contrasted, and plant  
 273 fitness of selection-lines is shown relative to two non-selected control treatments. In *Fallow-Soil Microbiome-Propa-*  
 274 *gation Control*, microbiomes were harvested from fallow soil (pot with no plant), then propagated to sterile fallow  
 275 soil in pots of next microbiome-generation. In *Null Control*, plants did not receive a microbiome inoculum, but mi-  
 276 crobes could “rain in” from air, as in all treatments. Selection and fallow-soil treatments had 5 selection lines each,  
 277 with 8 plants per line. **Right:** At the end of the experiment after a 9th selection cycle (Generation 9), plants were  
 278 grown to seed for 68 days. Total seed weight is plotted in blue for individual plants (plants of same selection line are  
 279 vertically above each other), the averages for each of the 5 selection lines are plotted in red. Two additional controls  
 280 were added in Generation 9: *Solute-Control*, filtering out bacterial & fungal components, to test only solutes & viral  
 281 microbiome components that are propagated; and *2x2 Cross-Fostering* to test for specificity of evolved microbiome  
 282 function. All controls are significantly different from selection treatments, except for aluminum-selected microbiomes  
 283 tested under sodium-stress (p-values are shown above each control, and are corrected using the false discovery rate  
 284 for post-hoc comparisons; see Supplemental Information, Tables S3 & S4). **Conclusion:** Host-mediated artificial  
 285 selection on microbiomes can generate bacterial microbiomes conferring salt-tolerance to plants; this effect is due to  
 286 bacterial microbiomes and not due to solutes (plant secretions, viruses, etc.) in soil. The effect of microbiomes selected  
 287 to confer tolerance to aluminum-sulfate appears non-specific (these microbiomes confer tolerance to both sodium-  
 288 and aluminum-sulfate stress;  $p>0.5$ ), but the effect of bacterial microbiomes selected to confer tolerance to sodium-  
 289 sulfate appears specific (these microbiomes do not confer salt-tolerance to aluminum-sulfate stress;  $p<0.002$ ).

## Artificial Selection on Microbiomes to Confer Salt-Tolerance to Plants

Mueller et al, bioRxiv, Draft 8Nov2019; please email comments to: umueller@austin.utexas.edu

290

291 **Effect of Artificially Selected Microbiomes on Seed Production:** In the last microbiome-generation after  
292 a ninth microbiome-selection cycle (Generation 9), we grew plants for 68 days to quantify the effect of our  
293 artificially-selected microbiomes on seed production. We also added two control treatments, *Solute-Trans-*  
294 *fer Control (Solute Control)* and *Cross-Fostering*, to help elucidate some of the mechanisms underlying the  
295 salt-tolerance-conferring effects of selected microbiomes on seed production. In the Solute Control treat-  
296 ments, we eliminated with 0.2 $\mu$ m filters live cells from the harvested microbiomes in the selection lines, to  
297 test the growth-enhancing effects of root secretions and viruses that may be co-harvested and co-transferred  
298 with bacterial microbiomes in the selection-lines. Plants receiving these bacterial-free filtered solutes (i)  
299 had significantly poorer seed-production compared to plants that received these same solutes together with  
300 the live bacterial microbiomes ( $p < 0.02$  for sodium-stress treatment;  $p < 0.05$  for aluminum-stress treatment;  
301 Tables S3 & S4); and (ii) had seed production comparable to plants from Null Control treatments ( $p > 0.7$   
302 for sodium-stress treatment;  $p > 0.25$  for aluminum-stress treatment; Tables S3 & S4) (Figure 2 right). These  
303 findings indicate that any plant secretions or viruses co-harvested with bacterial microbiomes did not ac-  
304 count for the effects of the selected microbiomes conferring salt-tolerance to plants, and that any co-har-  
305 vested solutes (e.g., root secretions) and viruses appear to affect plant growth like Null Control treatments.  
306

307

308 **Specificity Test by Crossing Evolved SOD- and ALU-Microbiomes with SOD- and ALU-Stress:** In  
309 the *Cross-Fostering* Control of the last microbiome-generation (Table S1c), we crossed harvested microbi-  
310 omes from the sodium-stress (SOD) and aluminum-stress (ALU) selection-lines with the two types of salt-  
311 stress in soil, to test specificity of the salt-ameliorating effects of the microbiomes. The effect of microbi-  
312 omes selected to confer tolerance to aluminum-sulfate appears non-specific (these aluminum-selected mi-  
313 crobiomes confer tolerance to both sodium- and aluminum-sulfate stress;  $p > 0.5$ ), but the effect of bacterial  
314 microbiomes selected to confer tolerance to sodium-sulfate appears specific (these sodium-selected micro-  
315 biomes do not confer salt-tolerance to aluminum-sulfate stress;  $p < 0.002$ ) (Figure 2 right, rightmost-graphs).  
316 The underlying microbial and metabolic mechanisms conferring specific and non-specific salt-tolerance are  
317 unknown, but metagenomic comparisons of the sodium-selected versus aluminum-selected microbiomes  
318 should help generate hypotheses that can be tested in future studies.  
319

320

321

## DISCUSSION

322 Our study aimed to improve the differential microbiome-propagation scheme that was originally developed  
323 by Swenson *et al* (2000), then test the utility of our improved methods by artificially selecting on microbi-  
324 omes to confer salt-stress tolerance to plants. Swenson's original whole-soil community propagation  
325 scheme failed to generate consistent and sustained benefits for plant growth; specifically, Swenson's growth  
326 enhancement due to the putatively selected communities was overall minor when averaged across all prop-  
327 agation-cycles (an average of about 10% growth enhancement), and highly variable between successive  
328 generations (Swenson *et al* 2000). To address these problems, we adopted in our experiment ideas from  
329 quantitative-genetics, microbial-ecology, and host-microbiome evolution to optimize experimental steps in  
330 our microbiome-propagation scheme, with the aim to improve perpetuation of beneficial microbiomes and  
331 improve microbiome assembly at the seedling stage. Specifically, our methods aimed to (a) facilitate eco-  
332 logical priority-effects during initial microbiome assembly (Fierer *et al* 2012; Scheuring & Yu 2012), thus  
333 increasing microbiome-inheritance by steering the initial recruitment of symbiotic bacteria into rhizosphere  
334 microbiomes of seedlings; (b) propagate microbiomes harvested from within the sphere of host-control (i.e.,  
335 microbiomes in close physical proximity to roots) (Yan *et al* 2017; Shi *et al* 2016), whereas Swenson *et al*  
336 (2000) harvested also microbes from outside the sphere of host control; (c) enhance carbon-dependent  
337 host-control of microbiome-assembly and host-control of microbiome-persistence by using low-carbon soil  
338 (Bais *et al* 2006; Bulgarelli *et al* 2013; Mueller & Sachs 2015; Coyte *et al* 2015; Tkacz & Poole 2015); and  
339 (d) ramping of salt-stress between selection-cycles to minimize the chance of either under-stressing or over-  
340 stressing plant. Without additional experiments, it is not possible to say which of these experimental steps  
was most important to increase efficacy and response to microbiome-selection. The observation that it is

## Artificial Selection on Microbiomes to Confer Salt-Tolerance to Plants

Mueller et al, bioRxiv, Draft 8Nov2019; please email comments to: umueller@austin.utexas.edu

341 possible to artificially select for microbiomes that confer drought tolerance to wheat grown in high-carbon  
342 potting soil (Metro-Mix 900, Jochum 2019) suggests that the low-carbon soil thought to be important in  
343 our experiment may not be essential for plant-mediated microbiome selection.  
344

345 Our conceptual approach of *host-mediated indirect selection on microbiomes* (Mueller & Sachs 2015),  
346 combined with our experimental approach aiming to capitalize on evolved mechanisms of *host-control*  
347 (Sachs *et al* 2004; Mueller & Sachs 2015; Foster *et al* 2017), differs from other approaches that view mi-  
348 crobiome-selection primarily as a multi-level selection process (“artificial ecosystem selection” sensu  
349 Swenson *et al* 2000; “meta-organism” selection or “hologenome” selection sensu Voss *et al* 2015, Rosen-  
350 berg & Zilber-Rosenberg 2016, Theis *et al* 2016; “multi-layered” selection sensu Shapira 2016). While  
351 these multi-level views capture some aspects of host-microbiome population-biology (van Opstal & Bor-  
352 denstein 2015; Theis *et al* 2016; Garcia & Kao-Kniffin 2018), we found that a multi-level selection view  
353 provides few useful insights for the design of microbiome-selection experiments. In contrast, basic princi-  
354 ples of quantitative-genetics, microbial-ecology, and host-microbiome evolution (Coyte *et al* 2015; Mueller  
355 & Sachs 2015; Tkacz & Poole 2015; Rillig *et al* 2016; Wright *et al* 2019) and particularly the host-centric  
356 concept of *host control* (Sachs *et al* 2004; Foster *et al* 2017) allowed us to identify and adjust critical ex-  
357 perimental steps and parameters in our differential microbiome-propagation scheme.  
358

359 Compared to two other experiments of host-mediated microbiome-selection (Swenson *et al* 2000; Panke-  
360 Buisse *et al* 2015), our selection scheme appears to generate more pronounced and more stable effects on  
361 plant phenotype as a result of host-mediated microbiome-selection. Except for the initial two selection-  
362 cycles (Figure 2a-d), our selected microbiomes consistently outperformed in subsequent selection-cycles  
363 the non-selected microbiomes of the control conditions. In contrast, for example, Swenson *et al*'s experi-  
364 ments sometimes resulted in selected microbiomes that were outperformed by control microbiomes. Our  
365 methods may have generated more stable microbiome-effects because (a) only bacteria, but no fungi were  
366 propagated between generations (Swenson *et al* suspected fungal diseases as cause of complete devastation  
367 of plant populations in several of their selection cycles); (b) we may have conducted our experiment in a  
368 more stable greenhouse environment; and (c) we selected for microbiomes conferring specific benefits (salt-  
369 tolerance), rather than the non-specific, general-purpose beneficial microbiomes selected by Swenson *et al*  
370 and Panke-Buisse *et al*. After only 1-3 selection cycles, our selected microbiomes consistently outper-  
371 formed the control microbiomes, with averages of 75% (SOD) and 38% (ALU) growth improvement rela-  
372 tive to Fallow-Soil Controls; and 13% (SOD) and 12% (ALU) growth improvement relative to Null Con-  
373 trols (Figure 2a-d). Most importantly, when quantifying plant fitness by total seed production in the final  
374 Generation 9, our selected microbiomes outperformed Fallow-Soil Controls, Null Controls, and Solute  
375 Controls by 120-205% (SOD) and 55-195% (ALU) (Figure 2 right). Although we achieved these results  
376 under very controlled greenhouse conditions that are very different from outdoor conditions, this seems a  
377 remarkable enhancement of plant productivity compared to traditional plant breeding.  
378

379 An interesting result is that microbiomes selected to benefit growth of plants during the early vegetative  
380 phase (biomass of 4-week-old plants, well before flowering; Figure 2 left) generated microbiomes with  
381 benefits that translated also into enhanced plant fitness during the reproductive phase by increasing seed set  
382 of 10-week-old plants (Figure 2 right). Rhizosphere microbiomes of grasses can change significantly during  
383 plant ontogeny (Edwards *et al* 2018), and therefore microbiomes selected to serve one function such as  
384 early growth may not necessarily optimize other functions such as seed set. Our observation that microbi-  
385 ome selection to promote early growth (Figure 2 left) also promotes increased seed set (Figure 2 right)  
386 therefore implies that (a) some of the same bacteria benefitting plants during the early vegetative phase  
387 under the tested salt stresses also benefit plants during reproductive phase in *B. distachyon*, despite possible  
388 changes in overall microbiome communities during plant ontogeny; (b) seed set is intrinsically tied to op-  
389 timal early growth in *B. distachyon*, possibly by accelerating the timing of flowering; and (c) microbiome-  
390 selection experiments aiming to increase seed productivity do not necessarily have to select on seed set as



## Artificial Selection on Microbiomes to Confer Salt-Tolerance to Plants

Mueller et al, bioRxiv, Draft 8Nov2019; please email comments to: umueller@austin.utexas.edu

391 a measured phenotype, but can shorten each selection cycle by selecting on other plant phenotypes, such as  
392 early vegetative growth.

393  
394 Because our experiment was the first systematic attempt to improve the methods of Swenson *et al* (2000),  
395 we predict that it should be possible to further optimize protocols of differential microbiome propagation.  
396 Microbiome-selection therefore could emerge as a novel tool to engineer and elucidate microbiome-func-  
397 tions in controlled laboratory environments, and possibly also in those natural environments that allow  
398 control of key parameters affecting microbiome harvest, microbiome transfer, and microbiome inheritance.  
399 Such optimization of microbiome-selection should ideally be informed by metagenomic analyses of exper-  
400 imental contrasts (e.g., comparison of microbiomes selected to confer either sodium-stress versus alumi-  
401 num-stress tolerance to plants) and by time-series analyses across microbiome-propagation cycles, to iden-  
402 tify candidate microbes and microbial consortia important in mediating stresses.

403

### 404 FUTURE RESEARCH TO IMPROVE METHODS OF MICROBIOME-SELECTION

405 To expand on our methods of artificial microbiome selection, we outline a series of additional experiments  
406 that should generate insights into key parameters that determine efficacy of microbiome selection. Arias-  
407 Sánchez *et al* (2019) and Xie *et al* (2019) recently summarized criteria for microbiome-selection experi-  
408 ments that are not host-mediated (e.g., selection on CO<sub>2</sub> emission by a complex microbiome, in absence of  
409 a plant host), Lawson *et al* (2019) summarized protocols for engineering any kind of microbiome (e.g., by  
410 using bottom-up and top-down design criteria), and we focus here on methods of host-mediated microbiome  
411 selection that aim to improve performance of a plant host. Because host-mediated microbiome selection  
412 leverages traits that evolved to assemble and control microbiomes (so-called host control; Mueller & Sachs  
413 2015, Foster *et al* 2017), the first four experiments explore whether factors promoting strong microbiome-  
414 control by a plant host could improve efficacy of microbiome selection:

415 (1) *Artificial microbiome-selection on endophytic vs. rhizosphere microbiomes*: Microbiomes internal to a  
416 host (e.g., endophytic microbes of plants) require some form of host infection, and therefore could be  
417 under greater host control than external microbiomes, such as rhizoplane or rhizosphere microbiomes.

418 Consequently, under stresses that are mediated by host-controlled microbes, it may be easier to obtain  
419 a response to microbiome-selection when targeting selection on endosphere microbiomes versus exter-  
420 nal microbiomes. This prediction can be tested in an experiment that compares, in separate selection  
421 lines in the same experiment, the responses to microbiome selection when harvesting and propagating  
422 only endophytic microbiomes versus only rhizosphere microbiomes. This prediction may not hold for  
423 stresses that require stress-mediation by microbes in the external microbiome compartment of roots  
424 (e.g., microbes that detoxify toxins, such as aluminum, before they enter the root and then affect the  
425 plant negatively; for example microbes that chelate toxins external to the plant in the rhizosphere, Ma  
426 *et al* 2001; Aggarwal *et al* 2015); however, this prediction about a key role of host control for the  
427 efficacy of microbiome selection should hold for many other stresses that are mediated by microbes  
428 that a plant permits to enter into the endophytic compartment.

429 (2) *Microbiome-selection in two genetic backgrounds differing in host-control*: A second approach to test  
430 for the role of host control is to compare microbiome-selection in two different host-genotypes, such  
431 as two inbred strains of the same plant species. For example, different host genotypes may recruit into  
432 symbiosis different kinds of microbes. Such differences in host-controlled microbiome recruitment  
433 could result in differences in microbiome-selection, and a microbiome artificially-selected within one  
434 host-genotype to improve one particular host trait may produce a different phenotypic effect when  
435 tested in a different host-genotype.

436 (3) *Varying host control by varying carbon-content in soil*: A third approach to test host control is to com-  
437 pare efficacy of microbiome selection in low- versus high-carbon soil. Microbial growth in some soils  
438 is limited by carbon, and many plants therefore regulate their soil-microbiomes by carbon secretions  
439 (Zahar Haichar *et al* 2016; Sasse *et al* 2018). We therefore hypothesized that a low-carbon soil (like  
440 the carbon-free PPC soil in our experiment) may facilitate host control and consequently also microbi-  
441 ome-selection. This hypothesis remains to be tested, for example in a microbiome-selection experiment  
442 contrasting response to selection between soils with different carbon content. The observation that it is

## Artificial Selection on Microbiomes to Confer Salt-Tolerance to Plants

Mueller et al, bioRxiv, Draft 8Nov2019; please email comments to: umueller@austin.utexas.edu

443 possible to artificially select for microbiomes that confer drought tolerance to wheat grown in high-  
444 carbon potting soil (Jochum 2019) suggests that low-carbon soil may not be essential for plant-mediated  
445 microbiome selection, but low-carbon soil could be a facilitating condition.

- 446 (4) *Varying resource-limited host control by varying seed size*: A fourth approach to test host control could  
447 be to compare the efficacy of microbiome selection between plant species with large seeds versus small  
448 seeds (e.g., *Brachypodium* versus *Arabidopsis*), or between seedlings of the same plant species grown  
449 from small versus large seeds. A germinating seed has to allocate resources to above-ground growth to  
450 fix carbon and to below-ground growth to access nutrients and water, and seedlings growing from re-  
451 source-rich large seeds therefore may be better able to allocate additional resources to manipulate mi-  
452 crobiomes effectively, for example by root secretions. If such resource-allocation constraints exist for  
453 young seedlings, this could explain why our microbiome-selection experiment with *B. distachyon* ap-  
454 pears to have generated stronger and faster response to microbiome selection compared to other such  
455 experiments with *Arabidopsis thaliana* (Swenson *et al* 2000; Panke-Buisse *et al* 2015). The best tests  
456 of seed-resource dependent efficacy of microbiome selection will not be comparisons between species,  
457 however, but within-species comparisons of the efficacy of microbiome selection within host popula-  
458 tions grown from resource-rich large seeds versus resource-poor small seeds of the same plant species.
- 459 (5) *Propagation of fractionated vs. whole microbiomes*: Experimental microbiome-propagation between  
460 host generations can be complete [all soil-community members are propagated between hosts, as in  
461 Swenson *et al* (2000) and Panke-Buisse *et al* (2015)] or microbiomes can be fractionated by excluding  
462 specific microbial components, as in our protocol where we propagated only organisms of bacterial or  
463 smaller sizes. We used fractionated microbiome-propagation because (a) we were more interested in  
464 elucidating contributions to host fitness of the understudied bacterial components than the fungal com-  
465 ponents (e.g., mycorrhizal fungi), and (b) fractionation simplifies analyses of the microbiome-responses  
466 to selection (e.g., bacterial microbiome components, but not necessarily fungal components, need to be  
467 analysed with metagenomic techniques). However, because fungal components and possible synergis-  
468 tic fungal-bacterial interactions cannot be selected on when using our fractionated microbiome-propa-  
469 gation scheme, we hypothesized previously (Mueller & Sachs 2015) that selection on fractionated mi-  
470 crobiomes may show attenuated selection responses compared to selection on whole microbiomes.  
471 This can be tested in an experiment comparing the response to microbiome selection when propagating  
472 fractionated versus whole microbiomes, for example by using different size-selecting filters.
- 473 (6) *Propagation of mixed vs. un-mixed microbiomes*. When propagating microbiomes to new hosts, it is  
474 possible to propagate mixed microbiomes harvested from different hosts, or only un-mixed microbi-  
475 omes. Mixed vs. un-mixed propagation schemes therefore represent two principal methods of microbi-  
476 ome selection (Swenson *et al* 2000; Williams & Lenton 2007; Mueller & Sachs 2015; Rillig *et al* 2016).  
477 We hypothesized previously (Mueller & Sachs 2015) that mixed propagation may generate a faster  
478 response to microbiome-selection, but the respective advantages of mixed versus un-mixed propagation  
479 have yet to be tested. Mixed propagation may be superior to un-mixed propagation, for example if  
480 mixing generates novel combinations of microbes with novel beneficial effects on a host (Mueller &  
481 Sachs 2015), or may merge previously separate networks of microbes into a superior compound net-  
482 work (so-called community-network coalescence; Rillig *et al* 2016), or generate novel competitive in-  
483 teractions between microbes that increase microbiome stability (Coyte *et al* 2015).

### 486 ACKNOWLEDGEMENTS

487 We thank Shane Merrell for help with greenhouse maintenance; Michael Mahometa for statistical advice;  
488 John Willis for suggesting the fallow-soil control treatment; Hannah Marti for suggesting the thermostat  
489 metaphor; John Vogel, Joey Knelman, Hannah Marti, Rong Ma, and Emma Dietrich for comments on the  
490 manuscript. We are grateful for funding from the Undergraduate Research Fellowship Program of the Col-  
491 lege of Natural Science at the University of Texas Austin (to KB), XXX (to JAE), XXX (to TEJ), XXX (to  
492 DLDM), the National Science Foundation (awards DEB0919519 & DEB1354666 to UGM), and the Stengl  
493 Endowment of the University of Texas at Austin.

## Artificial Selection on Microbiomes to Confer Salt-Tolerance to Plants

Mueller et al, bioRxiv, Draft 8Nov2019; please email comments to: umueller@austin.utexas.edu

### 494 REFERENCES

- 495 Aggarwal A, Ezaki B, Munjal A, Tripathi BN. 2015. Physiology and biochemistry of aluminum toxicity  
496 and tolerance in crops. Pp 35–57 in *Stress Responses in Plants* (Tripathi BN & Müller M, eds), Springer  
497 International Publishing.
- 498 Arias-Sánchez FI, Vessman B, Mitri S. 2019. Artificially selecting microbial communities: If we can breed  
499 dogs, why not microbiomes? *PLoS Biol* 17: e3000356. 2019. DOI: 10.1371/journal.pbio.3000356
- 500 Bais HP, Weir TL, Perry LG, Gilroy S, Vivanco JM. 2006. The role of root exudates in rhizosphere inter-  
501 actions with plants and other organisms. *Annu Rev Plant Biol* 57: 233–66.  
502 DOI: 10.1146/annurev.arplant.57.032905.105159
- 503 Bakken LR, Olsen RA. 1987. The relationship between cell size and viability of soil bacteria. *Microb Ecol*  
504 13: 103–114. DOI: 10.1007/BF02011247
- 505 Berg G, Smalla K. 2009. Plant species and soil type cooperatively shape the structure and function of mi-  
506 crobial communities in the rhizosphere. *FEMS Microbiol Ecol* 68: 1–13. DOI: 10.1111/j.1574-  
507 6941.2009.00654.x
- 508 Blouin M, Karimi B, Mathieu J, Lerch TZ. 2015. Levels and limits in artificial selection of communities.  
509 *Ecol Lett* 18: 1040–1048. DOI: 10.1111/ele.12486
- 510 Bright M, Bulgheresi S. 2010. A complex journey: transmission of microbial symbionts. *Nat Rev Microbiol*  
511 8: 218–230. DOI: 10.1038/nrmicro2262
- 512 Brkljačić J, Grotewold E, Scholl R, Mockler T, Garvin DF, Vain P, Brutnell T, Sibout R, Bevan M, Budak  
513 H, Caicedo AL, Gao C, Gu Y, Hazen SP, Holt BF, Hong S-Y, Jordan M, Manzaneda AJ, Mitchell-Olds  
514 T, Mochida K, Mur LAJ, Park C-M, Sedbrook J, Watt M, Zheng SJ, Vogel JP. 2011. *Brachypodium* as  
515 a model for the grasses: today and the future. *Plant Physiol* 157: 3–13. DOI: 10.1104/pp.111.179531
- 516 Bulgarelli D, Schlaeppi K, Spaepen S, van Themaat EVL, Schulze-Lefert P. 2013. Structure and functions  
517 of the bacterial microbiota of plants. *Annu Rev Plant Biol* 64: 807–838. DOI: 10.1146/annurev-arplant-  
518 050312-120106
- 519 Coyte KZ, Schluter J, Foster KR. 2015. The ecology of the microbiome: Networks, competition, and sta-  
520 bility. *Science* 350: 663–666. DOI: 10.1126/science.aad2602
- 521 De Meester L, Brans KI, Govaert L, Souffreau C, Mukherjee S, Vanvelk H, Korzeniowski K, Kilsdonk L,  
522 Decaestecker E, Stoks R, Urban, MC. 2019. Analysing eco-evolutionary dynamics—The challenging  
523 complexity of the real world. *Funct Ecol* 33: 43–59. DOI: 10.1111/1365-2435.13261
- 524 Des Marais DL, Juenger TE. 2011. *Brachypodium* and the abiotic environment. Pages 291–311 in *Genet-  
525 ics and Genomics of Brachypodium* (Vogel JP, ed). Springer International Publishing.  
526 DOI: 10.1007/7397\_2015\_13
- 527 Dodd IC, Pérez-Alfocea F. 2012. Microbial amelioration of crop salinity stress. *J Exp Bot* 63: 3415–3428.  
528 DOI: 10.1093/jxb/ers033.
- 529 Edwards JA, Santos-Medellín CM, Liechty ZS, Nguyen B, Lurie E, Eason S, Phillips G, Venkatesan  
530 Sundaresan V. 2018. Compositional shifts in root-associated bacterial and archaeal microbiota track the  
531 plant life cycle in field-grown rice. *PLoS Biol* 16: e2003862. DOI: 10.1371/journal.pbio.2003862
- 532 Falconer DS, Mackay TFC. 1996. *An Introduction to Quantitative Genetics*, Addison Wesley Longman.
- 533 Fierer N, Ferrenberg S, Flores GE, González A, Kueneman J, Legg T, Lynch RC, McDonald D, Mihaljevic  
534 JR, O'Neill SP, Rhodes ME, Song SJ, Walters WA. 2012. From animalcules to an ecosystem: Applica-  
535 tion of ecological concepts to the human microbiome. *Annu Rev Ecol Evol Syst* 43: 137–155. DOI:  
536 10.1146/annurev-ecolsys-110411-160307

## Artificial Selection on Microbiomes to Confer Salt-Tolerance to Plants

Mueller et al, bioRxiv, Draft 8Nov2019; please email comments to: umueller@austin.utexas.edu

- 537 Fitzpatrick BM. 2014. Symbiote transmission and maintenance of extra-genomic associations. *Front Microbiol* 5: 46. DOI: 10.3389/fmicb.2014.00046  
538
- 539 Foster KR, Schluter J, Coyte KZ, Rakoff-Nahoum S. 2017. The evolution of the host microbiome as an  
540 ecosystem on a leash. *Nature* 548: 43–51. DOI: 10.1038/nature23292
- 541 Garcia J, Kao-Kniffin J. 2018. Microbial group dynamics in plant rhizospheres and their implications on  
542 nutrient cycling. *Front Microbiol* 9: 1516. DOI: 10.3389/fmicb.2018.01516
- 543 Garland T, Rose MR. 2009. *Experimental Evolution*. University of California Press.
- 544 Garvin DF, Gu YQ, Hasterok R, Hazen SP, Jenkins G, Mockler TC, Mur LAJ, Vogel JP. 2008. Develop-  
545 ment of genetic and genomic research resources for *Brachypodium distachyon*, a new model system for  
546 grass crop research. *Crop Science* 48: S69–S84. DOI: 10.2135/cropsci2007.06.0332tpg
- 547 Hillman K, Goodrich-Blair H. 2016. Are you my symbiont? Microbial polymorphic toxins and antimicro-  
548 bial compounds as honest signals of beneficial symbiotic defensive traits. *Curr Opin Microbio* 31: 184–  
549 190. DOI: 10.1016/j.mib.2016.04.010
- 550 Jochum MD. 2019. Enhanced drought tolerance through plant growth promoting rhizobacteria and micro-  
551 biome engineering applications. PhD Thesis, Texas A&M, College Station, TX, USA
- 552 Kiers ET, Hutton MG, Denison RF. 2007. Human selection and the relaxation of legume defences against  
553 ineffective rhizobia. *Proc R Soc B* 274: 3119–3126 DOI: 10.1098/rspb.2007.1187
- 554 Lareen A, Burton F, Schäfer P. 2016. Plant root-microbe communication in shaping root microbiomes.  
555 *Plant Mol Biol* 90: 575–587. DOI: 10.1007/s11103-015-0417-8
- 556 Lawson CE, Harcombe WR, Hatzenpichler R, Lindemann SR, Löffler FE, O'Malley MA, García Martín  
557 H, Pflieger BF, Raskin L, Venturelli OS, Weissbrodt DG, Noguera DR, McMahon KD. 2019. *Nat Rev*  
558 *Microbiol* Epub ahead of print, 23.Sept.2019. DOI: 10.1038/s41579-019-0255-9.
- 559 Ma JF, Ryan PR, Delhaize E. 2001. Aluminium tolerance in plants and the complexing role of organic  
560 acids. *Trends Plant Sci* 6: 273–278. DOI: 10.1016/S1360-1385(01)01961-6
- 561 Mueller UG, Gerardo NM, Aanen DK, Six DL, Schultz TR. 2005. The evolution of agriculture in insects.  
562 *Annu Rev Ecol Evol Syst* 36: 563–595. DOI: 10.1146/annurev.ecolsys.36.102003.152626
- 563 Mueller UG, Sachs JL. 2015. Engineering microbiomes to improve plant and animal health. *Trends Micro-*  
564 *biol* 23: 606–617. DOI: 10.1016/j.tim.2015.07.009
- 565 Panke-Buisse K, Poole AC, Goodrich JK, Ley RE, Kao-Kniffin J. 2015. Selection on soil microbiomes  
566 reveals reproducible impacts on plant function. *ISME J* 9: 980–989. DOI: 10.1038/ismej.2014.196
- 567 Pfeiffer JA, Sporb A, Koren O, Jinb Z, Tringe S, Dangl JL, Buckler ES, Ley RE. 2013. Diversity and  
568 heritability of the maize rhizosphere microbiome under field conditions. *Proc Natl Acad Sci USA* 110:  
569 6548–6553. DOI: 10.1073/pnas.1302837110
- 570 Rillig MC, Tsang A, Roy J. 2016. Microbial community coalescence for microbiome engineering. *Front*  
571 *Microbiol* 7: 1967. DOI: 10.3389/fmicb.2016.01967
- 572 Roossinck MJ. 2015. Plants, viruses and the environment: Ecology and mutualism. *Virology* 479-480: 271–  
573 277. DOI: 10.1016/j.virol.2015.03.041
- 574 Rosenberg E, Zilber-Rosenberg I. 2016. Microbes drive evolution of animals and plants: The hologenome  
575 concept. *mBio* 7: e01395-15. DOI: 10.1128/mBio.01395-15
- 576 Sachs JL, Mueller UG, Wilcox TP, Bull JJ. 2004. The evolution of cooperation. *Quart Rev Biol* 79: 135–  
577 160. DOI: 10.1086/383541
- 578 Sachs, JL, Russell JE, Lii YE, Black KC, Lopez G, Patil AS. 2010. Host control over infection and prolif-  
579 eration of a cheater symbiont. *J Evol Biol* 23: 1919–1927. DOI: 10.1111/j.1420-9101.2010.02056.x

## Artificial Selection on Microbiomes to Confer Salt-Tolerance to Plants

Mueller et al, bioRxiv, Draft 8Nov2019; please email comments to: umueller@austin.utexas.edu

- 580 Sasse J, Martinoia E, Northen T. 2018. Feed your friends: Do plant exudates shape the root microbiome?  
581 *Trends Plant Sci* 23: 25-41. DOI: 10.1016/j.tplants.2017.09.003
- 582 Scheuring I, Yu DW. 2012. How to assemble a beneficial microbiome in three easy steps. *Ecol Lett* 15:  
583 1300–1307. DOI: 10.1111/j.1461-0248.2012.01853.x
- 584 Shapira M. 2016. Gut microbiotas and host evolution: Scaling up symbiosis. *Trends Ecol Evol* 31: 539–  
585 549. DOI: 10.1016/j.tree.2016.03.006
- 586 Shi S, Nuccio EE, Shi ZJ, He Z, Zhou J, Firestone MK. 2016. The interconnected rhizosphere: High net-  
587 work complexity dominates rhizosphere assemblages. *Ecol Lett* 19: 926–936. DOI: 10.1111/ele.12630.
- 588 Strauss S. 2014. Ecological and evolutionary responses in complex communities: implications for invasions  
589 and eco-evolutionary feedbacks. *Oikos* 123: 257–266. DOI: doi.org/10.1111/j.1600-0706.2013.01093.x
- 590 Swenson W, Wilson DS, Elias R. 2000. Artificial ecosystem selection. *Proc Natl Acad Sci USA* 97: 9110–  
591 9114. DOI: 10.1073/pnas.150237597
- 592 Tkacz A, Poole P. 2015. Role of root microbiota in plant productivity. *J Exp Bot* 66: 2167–2175. DOI:  
593 10.1093/jxb/erv157
- 594 Theis KR, Dheilly NM, Klassen JL, Brucker RM, Baines JF, Bosch TCG, Cryan JF, Gilbert SF, Goodnight  
595 CJ, Lloyd EA, JSapp J, Vandenkoornhuysen P, Zilber-Rosenberg I, Rosenberg E, Bordenstein SR. 2016.  
596 Getting the hologenome concept right: an eco-evolutionary framework for hosts and their microbiomes.  
597 *mSystems* 1: e00028-16. DOI: 10.1128/mSystems.00028-16
- 598 van Opstal EJ, Bordenstein S. 2015. Rethinking heritability of the microbiome. *Science* 349: 1172–1173.  
599 DOI: 10.1126/science.aab3958
- 600 Vogel JP, Garvin DF, Leong O, Hayden DM. 2006. *Agrobacterium*-mediated transformation and inbred  
601 line development in the model grass *Brachypodium distachyon*. *Plant Cell, Tissue & Organ Culture* 84:  
602 199–211. DOI: 10.1007/s11240-005-9023-9
- 603 Vogel J, Bragg J. 2009. *Brachypodium distachyon*, a new model for the Triticeae. In *Genetics and Genomics*  
604 *of the Triticeae*, pp. 427–449. Edited by GJ Muehlbauer & C Feuillet. New York: Springer.
- 605 Voss JD, Leon JC, Dhurandhar NV, Robb FT. 2015. Pawnobiome: manipulation of the hologenome within  
606 one host generation and beyond. *Front Microbiol* 6: 697. DOI: 10.3389/fmicb.2015.00697
- 607 Williams HTP, Lenton TM. 2007. Artificial selection of simulated microbial ecosystems. *Proc Natl Acad*  
608 *Sci USA* 104: 8918–8923. DOI: 10.1073/pnas.0610038104
- 609 Wright RJ, Gibson MI, Christie-Oleza JA. 2019. Understanding microbial community dynamics to improve  
610 optimal microbiome selection. *Microbiome* 7: 85. DOI: 10.1186/s40168-019-0702-x
- 611 Xie L, Yuan AE, Shou W. 2019. Simulations reveal challenges to artificial community selection and possible  
612 strategies for success. *PLoS Biol* 17: e3000295. DOI: 10.1371/journal.pbio.3000295
- 613 Yan Y, Kuramae EE, de Hollander M, Klinkhamer PGL, van Veen JA. 2017. Functional traits dominate  
614 the diversity-related selection of bacterial communities in the rhizosphere. *ISME J* 11: 56–66. DOI:  
615 10.1038/ismej.2016.108
- 616 Zahar Haichar F, Heulin T, Guyonnet JP, Achouak W. 2016. Stable isotope probing of carbon flow in the  
617 plant holobiont. *Curr Opin Biotech* 41: 9–13. DOI: 10.1016/j.copbio.2016.02.023
- 618 Zeng Q, Wu S, Sukumaran J, Rodrigo A. 2017. Models of microbiome evolution incorporating host and  
619 microbial selection. *Microbiome* 5: 127. DOI: 10.1186/s40168-017-0343-x
- 620

## Artificial Selection on Microbiomes to Confer Salt-Tolerance to Plants

Mueller et al, bioRxiv, Draft 8Nov2019; please email comments to: umueller@austin.utexas.edu

### 621 SUPPLEMENTAL INFORMATION: METHODS & RESULTS

622 **Protocol Outline:** We used a differential host-microbiome  
623 co-propagation scheme as described in Swenson *et al* (2000) and in Mueller *et al* (2005) (Figure S1), but we  
624 added to this scheme protocol steps of established techniques, including (a) microbiome-fractionation using  
625 size-selecting filters (Bakken & Olsen 1987; Mueller & Sachs 2015); (b) ramping of stress in successive selection  
626 cycles (Garland & Rose 2009); (c) facilitation of priority effects during microbiome assembly (Fierer *et al*  
627 2012; Scheuring & Yu 2012) by capping pots for the first 4 days of the germination stage (i.e., we used a so-  
628 called *semi-open system*; Mueller & Sachs 2015), thus controlling in each selection cycle the initial recruitment  
629 of symbiotic bacteria into rhizosphere microbiomes of seedlings; and (d) low-carbon soil to enhance carbon-  
630 dependent host-control of microbiome assembly and microbiome persistence (Bais *et al* 2006; Bulgarelli *et al*  
631 2013; Mueller & Sachs 2015; Coyte *et al* 2015). In each microbiome-propagation cycle ('Microbiome Genera-  
632 tion' = Gen), we inoculated surface-sterilized seeds taken from non-evolving stock (inbred strain Bd3-1 of  
633 the grass *Brachypodium distachyon*, derived via single-seed-descent inbreeding from the source accession; Vo-  
634 gel *et al* 2006; Garvin *et al* 2008; Vogel & Bragg 2009; Brkljacic *et al* 2011). We chose to conduct the experi-  
635 ment with *B. distachyon* because it is a model for biofuel and cereal crops, including research on salt stresses and  
636 water-use efficiency (De Marais & Juenger 2011; De Marais *et al* 2016).

651 We inoculated seeds with rhizosphere bacteria harvested  
652 from roots of those plants of the previous selection cycle that exhibited the greatest above-ground biomass (Fig-  
653 ure S1). Because the plant-host could not evolve between selection-cycles (seeds were taken from non-  
654 evolving stock), whereas microbiomes could potentially evolve due to differential microbiome propagation, our  
655 selection-scheme was *one-sided selection* (Mueller & Sachs 2015). Both evolutionary and ecological pro-  
656 cesses alter microbiomes during and between selection-cycles, but our protocol aimed to maximize evolu-  
657 tionary changes stemming from differential microbiome-propagation (Figure S1). To focus indirect selec-  
658 tion on bacterial communities, we filtered the microbiomes harvested from rhizospheres, perpetuating only  
659 bacteria (and possibly also viruses) to the next generation, but eliminating from propagation between mi-  
660 crobiome-generations any larger-celled soil-organisms with filters (i.e., we excluded fungi, protozoa, algae,  
661 mites, nematodes, etc.). This fractionation step distinguishes our methods from those of Swenson *et al*  
662 (2000) and from a replication of that study by Panke-Buisse *et al* (2015), both of which used differential  
663 'whole-community' propagation to transfer between generations all organism living in soil, including the  
664 larger-celled fungi, protozoa, algae, mites, and nematodes that were excluded through size-selecting filter-  
665 ing in our experiment. Our complete experiment involved one baseline Generation (Generation 0, Table  
666 S1a) to establish initial microbiomes in replicate pots; 8 rounds of microbiome-selection (i.e., differential  
667 microbiome-propagation) (Generations 1-8, Table S1b); and one final ninth round of selection (Generation  
668  
669  
670

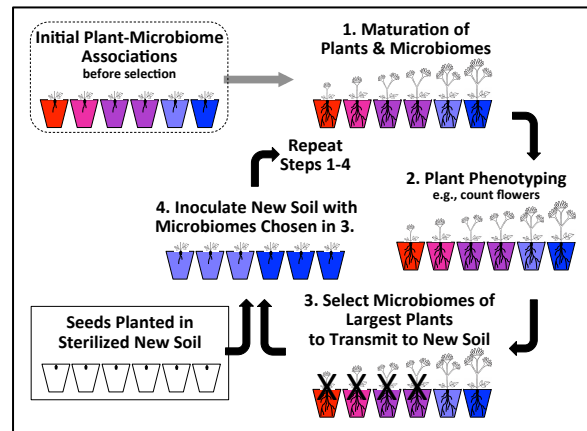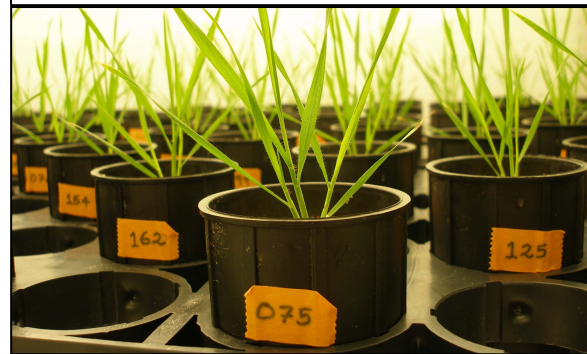

**Figure S1. Top:** Differential microbiome-propagation scheme to impose artificial indirect selection on rhizosphere microbiomes (figure modified from Mueller & Sachs 2015). The host-plant does not evolve because this scheme propagates only microbiomes into sterilized soil (Step 4), whereas the host is taken each cycle from a non-evolving source (stored seeds). Both evolutionary and ecological processes alter microbiomes during each cycle, but at Steps 3&4 in each cycle, experimental protocols aim to maximize evolutionary changes stemming from differential propagation of microbiomes. **Bottom:** *Brachypodium distachyon* Bd3-1 plants in our growth chamber shortly before a microbiome-harvest for differential microbiome-propagation to soils/seeds of the next microbiome-generation. Photo by UGM.

## Artificial Selection on Microbiomes to Confer Salt-Tolerance to Plants

Mueller et al, bioRxiv, Draft 8Nov2019; please email comments to: umueller@austin.utexas.edu

671 9, Table S1c) to evaluate the effects of the engineered (i.e., evolved) microbiomes on flower-production  
 672 and seed-set, for a total of 10 Generations. Our entire selection experiment lasted 300 days from 3. January  
 673 -29. October 2015 (Table S2).

674 **Logic of Salt-Stress Ramping:** We used ramping of salt-stress (Mueller & Sachs 2015) to ensure that (a)  
 675 plants were neither under-stressed nor excessively over-stressed during any selection-cycle of our microbi-  
 676 ome-selection experiment, and thus (b) facilitate that microbiomes can gradually improve under differential  
 677 microbiome-propagation to confer increasingly greater salt-tolerance to plants under increasingly greater  
 678 salt-stress. The experimental rationale of stress-ramping is as follows: if salt-stress is too weak, all plants  
 679 grow well, any salt-stress-mediating microbiomes will make little or no difference to plants, and no micro-  
 680 biome-mediated variation in plant-phenotype may emerge that could be used as direct target for indirect  
 681 selection on microbiomes; in contrast, if salt-stress is excessive, all plants suffer severely, and any observed  
 682 variation in plant-phenotype may be due to microbiome-unrelated effects emerging under excessive stress,  
 683 such that possible beneficial effects of salt-stress-mediating microbiomes are dwarfed and masked by the  
 684 excessive stress. Stress-ramping is therefore an experimental trick that permits an experimenter to continu-  
 685 ously adjust stress during a selection experiment, particularly in experimental evolution where the evolving  
 686 effect sizes cannot be known *a priori* (i.e., in our experiment, it was not possible to predict *a priori* the  
 687 approximate effect sizes attributable to beneficial microbiomes that could emerge as a result of multiple  
 688 rounds of differential microbiome-propagation).

689 Table S2 shows the ramped salt-concentrations for the two salt treatments of soils in our experiment,  
 690 Na<sub>2</sub>SO<sub>4</sub> (sodium-sulfate, henceforth *SOD-soil treatment*) and Al<sub>2</sub>(SO<sub>4</sub>)<sub>3</sub> (aluminum-sulfate, *ALU-soil treat-*  
 691 *ment*). We chose the particular two salt stresses because sodium-cations are a problem in saline and sodic  
 692 soils (e.g., Lodeyro & Carrillo 2015), and aluminum-cations are a problem because aluminum inhibits, at  
 693 even minimum concentrations, plant growth in low-pH soils (Delhazie *et al* 1995; Aggarwal *et al* 2015).  
 694 Our maximum sodium-salt stress of 75 mMolar salt-concentration sodium-sulfate of water used to hydrate  
 695 soil and water plants during the experiment is not quite comparable to the salt stress of 500 mMolar sodium-  
 696 chloride used by Priest *et al* (2014) because (a) the two experiments used different kinds of salts and (b)  
 697 Priest *et al* spiked salt stress after initial growth of unstressed plants, whereas in our experiment the plants  
 698 were salt-stressed already at the germination stage and at all times during each selection cycle.

699 **Table S2. Salt concentrations (Millimolar = mMolar) of salt-nutrient solutions used to hydrate soil** for each  
 700 selection cycle (= Microbiome-Generation = Gen); the recipes to mix these solutions; and growth parameters for each  
 701 Generation. In the short-cycled Generations 0-8, time was too short for plants to flower, and we quantified plant-  
 702 performance by visually estimating above-ground biomass (see *Phenotyping of Plants*). In Generation 9, plants were  
 703 grown for 68 days to produce seeds, and we quantified plant-performance as total seed weight per plant.

|                                                            | <b>Microbiome-Generation (Selection Cycle)</b> |                    |                    |                    |                   |                   |                   |                   |                   |                   |
|------------------------------------------------------------|------------------------------------------------|--------------------|--------------------|--------------------|-------------------|-------------------|-------------------|-------------------|-------------------|-------------------|
|                                                            | <b>Gen 0</b>                                   | <b>Gen 1</b>       | <b>Gen 2</b>       | <b>Gen 3</b>       | <b>Gen 4</b>      | <b>Gen 5</b>      | <b>Gen 6</b>      | <b>Gen 7</b>      | <b>Gen 8</b>      | <b>Gen 9</b>      |
| <b>Sodium-Sulfate Concentration</b>                        | <b>20 mMolar</b>                               | <b>30 mMolar</b>   | <b>50 mMolar</b>   | <b>60 mMolar</b>   | <b>70 mMolar</b>  | <b>75 mMolar</b>  | <b>60 mMolar</b>  | <b>60 mMolar</b>  | <b>60 mMolar</b>  | <b>60 mMolar</b>  |
| <b>1-molar sodium-sulfate</b>                              | 240 mL                                         | 360 mL             | 600 mL             | 720 mL             | 840 mL            | 900 mL            | 720 mL            | 720 mL            | 720 mL            | 1200 mL           |
| <b>Dyna-Gro fertilizer</b>                                 | 240 mL                                         | 240 mL             | 240 mL             | 240 mL             | 240 mL            | 240 mL            | 240 mL            | 240 mL            | 240 mL            | 400 mL            |
| <b>e-pure water</b>                                        | 12 L                                           | 12 L               | 12 L               | 12 L               | 12 L              | 12 L              | 12 L              | 12 L              | 12 L              | 20 L              |
| <b>number of pots (plants)</b>                             | 100                                            | 100                | 100                | 100                | 100               | 100               | 100               | 100               | 100               | 200               |
| <b>Aluminum-Sulfate Concentration</b>                      | <b>0.02 mMolar</b>                             | <b>0.04 mMolar</b> | <b>0.08 mMolar</b> | <b>0.20 mMolar</b> | <b>1.0 mMolar</b> | <b>3.0 mMolar</b> | <b>1.0 mMolar</b> | <b>1.0 mMolar</b> | <b>1.5 mMolar</b> | <b>1.5 mMolar</b> |
| <b>1-molar aluminum-sulfate</b>                            | 240 μL                                         | 480 μL             | 960 μL             | 2.4 mL             | 12 mL             | 36 mL             | 12 mL             | 12 mL             | 18 mL             | 30 mL             |
| <b>Dyna-Gro fertilizer</b>                                 | 240 mL                                         | 240 mL             | 240 mL             | 240 mL             | 240 mL            | 240 mL            | 240 mL            | 240 mL            | 240 mL            | 400 mL            |
| <b>e-pure water</b>                                        | 12 L                                           | 12 L               | 12 L               | 12 L               | 12 L              | 12 L              | 12 L              | 12 L              | 12 L              | 20 L              |
| <b>number of pots (plants)</b>                             | 100                                            | 100                | 100                | 100                | 100               | 100               | 100               | 100               | 100               | 200               |
| <b>Start date (= microbiome transfer/inoculation date)</b> | 03. Jan 2015                                   | 25. Jan 2015       | 14. Feb 2015       | 07. Mar 2015       | 31. Mar 2015      | 25. Apr 2015      | 27. May 2015      | 22. Jun 2015      | 20. Jul 2015      | 20. Aug 2015      |

## Artificial Selection on Microbiomes to Confer Salt-Tolerance to Plants

Mueller et al, bioRxiv, Draft 8Nov2019; please email comments to: umueller@austin.utexas.edu

|                                                                                              |            |            |            |            |            |            |        |        |        |                                |
|----------------------------------------------------------------------------------------------|------------|------------|------------|------------|------------|------------|--------|--------|--------|--------------------------------|
| Number of days plants allowed to grow until microbiome harvest & transfer to next generation | 22         | 20         | 21         | 24         | 25         | 32         | 26     | 28     | 31     | 68                             |
| Number of leaves of well-growing plants at day of microbiome harvest & transfer              | 9-11       | 9-11       | 9-11       | 10-13      | 8-10       | 11-13      | 11-14  | 17-22  | 25-30  | plants allowed to grow to seed |
| Number of plants                                                                             | 200        | 200        | 200        | 200        | 200        | 200        | 200    | 200    | 200    | 400                            |
| Weight bin of seeds used for planting                                                        | 5.8-5.9 mg | 5.7-5.8 mg | 5.5-5.6 mg | 5.4-5.5 mg | 5.3-5.4 mg | 5.2-5.3 mg | 5.1 mg | 5.0 mg | 4.9 mg | 4.6-4.8 mg                     |

704 A second pre-planned feature of our experimental design was to use ‘short-cycling’ in the initial selection-  
 705 cycles (cycling at about 20-day intervals; plants grew to about the 9-13 leaf stage to grow sufficiently large  
 706 root systems for microbiome harvest, but plants did not have sufficient time to flower), and then to increase  
 707 lengths of selection-cycles gradually as plants became more stressed under the ramped salt-concentrations  
 708 and plants needed more time to grow to the 9-13 leaf stage. Although we planned lengthening the duration  
 709 of selection-cycles during our multi-generation experiment, we did not pre-plan at the beginning of our  
 710 experiment the exact length of each selection-cycle, because the exact transfer dates were dependent also  
 711 on time-constraints of the main experimenter (UGM) handling the microbiome-transfers. Because we in-  
 712 creased salt-stress during the 10-Generation experiment (Table S2), plant growth was slower in later gen-  
 713 erations.

714 **Preparation of *Brachypodium distachyon* Seeds:** Prior to the start of the microbiome-selection experi-  
 715 ment, we harvested about 6000 seeds from 36 plants (*B. distachyon* strain Bd3-1; Garvin *et al* 2008; Vogel  
 716 & Bragg 2009) grown simultaneously at room temperature under constant light-cycle (14h light, 10h dark)  
 717 in well-homogenized, well-watered and well-fertilized greenhouse potting soil. Seeds were air-dried at  
 718 room temperature for 4 months, mixed well, then weighed individually to the nearest 0.1mg to generate  
 719 cohorts of seeds of equal weight (binned to within 0.1mg). To reduce within-generation phenotypic varia-  
 720 tion due to differences in seed-weight-dependent maternal effects, we used seeds of only one or two adja-  
 721 cent weight-bins for each generation (see last row in Table S2). We used seeds of 5.9&5.8mg weight for  
 722 the initial baseline Generation 0, then we used up seeds of bins of gradually decreasing seed-weight  
 723 (5.9&5.8mg, 5.8&5.7mg, 5.6&5.5mg, ...), as shown in Table S2 for each microbiome-generation. All mi-  
 724 crobiome selection-cycles used seeds from this stored (non-evolving) seed-stock of Bd3-1 plants, and mi-  
 725 crobiomes were therefore selected under a so-called *one-sided selection* scheme in the single plant-geo-  
 726 type background Bd3-1 (only microbiomes can change between selection-cycles, but the plant-host cannot  
 727 evolve; Mueller & Sachs 2015).

728 **Growth Chamber:** For the multi-generation selection experiment, we grew plants under constant temper-  
 729 ature (24°C) and constant light-cycle (20h light 4AM-midnight, 4h dark) in a walk-in growth chamber  
 730 (model MTPS72; Conviron, Winnipeg, Canada) at the Welch Greenhouse Facility of the University of  
 731 Texas at Austin. The chamber was not humidity-controlled, and chamber humidity therefore varied with  
 732 outdoor humidity/rainfall and with any heating (in winter) affecting humidity of the air circulating in the  
 733 Greenhouse Facility. Because of unusual rainfall in spring 2015, humidity was highest in the growth cham-  
 734 ber during Generations 4 & 5 (Table S1 & S2), and lowest during selection-cycles 0-2 and 7-9. Unfortu-  
 735 nately, we did not monitor exact humidity with a hygrometer in the chamber, but we recorded in a journal  
 736 any days of high humidity. We grew plants on two shelves (each 120cm x 100cm) in the Conviron chamber,  
 737 under fluorescent lights (Sylvania T8 fluorescent tubes spaced at 10cm, plus a center row of T2 fluorescent  
 738 spiral-bulbs) generating a light-intensity of 192  $\mu\text{mol}/\text{m}^2/\text{s}$  at soil level. Except for preparation of pots and  
 739 planting of seeds, we performed all experimental steps for artificial microbiome-selection in this chamber,  
 740 including microbiome-harvesting from rhizospheres, microbiome-fractionation (filtering), and microbi-  
 741 ome-transfers to surface-sterilized seeds planted in sterile soil (details below).

742 **Soil & Pot Preparation:** We grew plants from surface-sterilized seeds, each planted individually in the  
 743 center of its own D50-Deepot (5cm pot diameter, 17.8cm depth, total volume 262ml; model D16H; Stewe



## Artificial Selection on Microbiomes to Confer Salt-Tolerance to Plants

Mueller et al, bioRxiv, Draft 8Nov2019; please email comments to: umueller@austin.utexas.edu

744 & Sons, Tangent, Oregon, USA) filled with autoclaved PPC soil (Profile Porous Ceramic soil, Greens-  
745 Grade™ Emerald, Natural Color; PROFILE Products LLC, Buffalo Grove, IL, USA). To permit autoclav-  
746 ing of soil in the Deepots prior to planting, we pressed heat-tolerant fiberglass-fill into the bottom of each  
747 pot to plug bottom-drainage holes, then compacted dry PPC soil into each pot until the soil level reached  
748 15mm below the pot margin. Each plug consisted of a fiberglass square (9.5cm x 9.5cm) cut from an insu-  
749 lation-sheet (R-13 EcoTouch Insulation Roll; 38cm width; GreenGuard-certified, formaldehyde-free), then  
750 pressed firmly into the bottom of a pot. After compacting soil in all pots used for a given selection-cycle  
751 (200 pots in selection-cycles Generation 0-8; 400 pots in the final Generation 9) we carefully equalized soil  
752 levels between all pots.

753 According to the manufacturer's website ([www.profileevs.com/products/soil-amendments/profile-porous-](http://www.profileevs.com/products/soil-amendments/profile-porous-ceramic-ppc)  
754 [ceramic-ppc](http://www.profileevs.com/products/soil-amendments/profile-porous-ceramic-ppc)), PPC soil is a calcined, non-swelling illite, non-crystalline opal mineral; it has 74% pore  
755 space, with 39% capillary (water) pores and 35% non-capillary (air) pores; pH = 5.5; cation-exchange-  
756 capacity of 33.6 mEq/100g; and a chemical composition of 74% SiO<sub>2</sub>, 11% Al<sub>2</sub>O<sub>3</sub>, 5% Fe<sub>2</sub>O<sub>3</sub>, and less than  
757 5% of the remainder combining all other chemicals (e.g., CaO, MgO, K<sub>2</sub>O, Na<sub>2</sub>O, TiO<sub>2</sub>). We chose PPC  
758 soil for three reasons: First, PPC has a very homogeneous consistency because of its uniform particle size;  
759 soil-quantity and soil-quality are therefore easy to standardize between pots. Second, whole root systems  
760 can be easily extracted from hydrated soil with little rupture of roots. Third, because the manufacturer  
761 exposes PPC soil to high temperature (heated in a rotary kiln at 1200 degrees Fahrenheit, then de-dusted),  
762 the soil contains minimum carbon, and we believed that such low- or no-carbon soil could facilitate a plant's  
763 ability for carbon-mediated host-control (via carbon secretions by roots; see above *Protocol Outline*) (Bais  
764 *et al* 2006; Bulgarelli *et al* 2013; Mueller & Sachs 2015; Coyte *et al* 2015) of microbiome-assembly and  
765 microbiome-stability.

766 **Soil Hydration & Salt-Stress Treatments:** After compacting soil into each pot with a wooden dowel and  
767 equalizing soil levels between all pots used in a selection-cycle, we hydrated each pot with 94ml of a ferti-  
768 lizer-salt solution (recipes for solutions are listed in Table S2, and are described also below). The fertilizer  
769 concentrations in this solution was identical in each selection-cycle (i.e., we added the same amount of  
770 fertilizer to soil of each microbiome generation), but we increased salt-concentrations gradually between  
771 successive selection-cycles in order to ramp salt-stress, as shown in Table S2 for the two salt-stress treat-  
772 ments, Na<sub>2</sub>S<sub>0</sub><sub>4</sub> (decahydrate sodium-sulfate, MW=322.2g; *SOD-soil*) and Al<sub>2</sub>(S<sub>0</sub><sub>4</sub>)<sub>3</sub> (anhydrous aluminum-  
773 sulfate, MW=342.15; *ALU-soil*). We chose the particular two salt stresses because sodium is a problem in  
774 saline soils (e.g., Lodeyro & Carrillo 2015), and aluminum is a problem because aluminum inhibits, at even  
775 minimum concentrations, plant growth in low-pH soils (Delhazie *et al* 1995; Aggarwal *et al* 2015). Because  
776 of this pH-dependent growth-attenuating effect of aluminum in soil, we suspected that it may be easier to  
777 select for a microbiome conferring tolerance to aluminum salt, for example by selecting for a microbiome  
778 that increases soil pH (i.e., artificial microbiome-selection would select against acidifying bacteria in mi-  
779 crobiomes). We therefore were able to formulate this *a priori* hypothesis on a possible pH-based mecha-  
780 nistic basis of a microbiome-conferred tolerance to aluminum-salt. In contrast, we did not formulate a simi-  
781 larly specific mechanistic hypothesis for why a microbiome could confer tolerance to sodium-salt, although  
782 a number of hypotheses have been suggested in the literature, such as changes in phytohormone concentra-  
783 tions influencing plant physiology, or indirect physiological effects on transpiration rates (Dodd & Pérez-  
784 Alfocea 2012). We included this second selection-regime selecting for microbiomes conferring sodium-  
785 tolerance because a dual experimental design of two soil-treatments (aluminum- and sodium-salt stress)  
786 offered two advantages: (i) we could contrast evolving microbiomes between aluminum- versus sodium-  
787 treatments to identify candidate bacterial taxa or candidate consortia that may be important in mediating  
788 microbiome-conferred salt-tolerance to plants; and (ii) we could cross selection history with selection stress  
789 in the last Generation 9 to test for possible specificities of evolved microbiomes, as explained further in  
790 *Crossing Evolved SOD- and ALU-Microbiomes with SOD- and ALU-Stress*.

791 The salt-concentration of the baseline Generation 0 (Table S2) was determined in a salt-gradient pilot ex-  
792 periment as that salt-concentration that caused a minimal, but just noticeable, delay in germination and a

## Artificial Selection on Microbiomes to Confer Salt-Tolerance to Plants

Mueller et al, bioRxiv, Draft 8Nov2019; please email comments to: umueller@austin.utexas.edu

793 minimal growth-rate reduction. Because aluminum-sulfate delays germination and attenuates growth at far  
794 lower concentrations than sodium-sulfate, concentrations in the ALU-treatment (Table S2) were lower by  
795 several orders of magnitude than the concentrations of sodium-sulfate in the SOD-treatment. For ramping  
796 of salt-stress, pre-planned step-increments in salt-concentration between selection-cycles were likewise in-  
797 formed by our pilot experiments, which suggested increments for aluminum-sulfate concentrations of about  
798 two- to five-fold for the first few microbiome-generations, and less than two-fold increments for sodium-  
799 sulfate concentrations, with gradual decrease in step-increments in later microbiome-generations so as not  
800 to over-stress plants (Table S2). Because we had to prepare hydrated soil for the next selection-cycle about  
801 1-2 weeks before the end of a given cycle, we had to decide salt-stress increments for the next selection-  
802 cycle well in advance, using information from relative growth of younger plants in the sodium-sulfate and  
803 the aluminum-sulfate treatments. Decisions on salt-increments between Generations therefore typically in-  
804 volved some informed guessing, to adjust salt concentrations for the next cycle such that plants in either  
805 treatment were projected to germinate and grow at about the same rate (i.e., we aimed for plants in either  
806 salt treatment to grow to comparable sizes in the same time during a selection cycle). With such projected  
807 equal growth between sodium- and aluminum-treatments, microbiomes could be harvested at the end of a  
808 selection cycle from plants of comparable sizes (typically 9-15 leaves at the time of microbiome harvesting)  
809 regardless of whether a plant was stressed with aluminum-sulfate or sodium-sulfate (i.e., sodium-treated  
810 plants were not behind in growth compared to aluminum-treated plants, or vice versa). A second pre-  
811 planned feature of our salt-ramping design was to increase salt-stress in successive selection-cycles as long  
812 as differences in effect-sizes seemed to increase between salt- and control-treatments, but to reduce the salt-  
813 stress if differences in effect-sizes diminished or disappeared, possibly because of over-stressing the plants  
814 (see above *Logic of Salt-Stress Ramping*). This seemed to happen in Generations 4 & 5 (see Figure 1 in  
815 main text), and salt-stress was therefore reduced somewhat in the subsequent four Generations 6-9 (Table  
816 S2).

817 For hydration of 100 pots, we mixed, in a large carboy, 12 liter double-distilled e-pure water at a 50:1-ratio  
818 with 240ml Dyna-Gro 9-7-5 (Nutrient Solutions, Richmond, CA; www.dyna-gro.com/795.htm), plus an  
819 aliquot of 1-Molar salt solution (Table S2 lists salt-aliquots in recipes for salt-nutrient mixes) to generate  
820 the specific salt-stress planned for a particular selection-cycle. [To prepare 1-Molar ALU-salt stock, we  
821 dissolved 307.94g anhydrous aluminum-sulfate in 900ml e-pure water in a 1-liter bottle; to prepare 1-Molar  
822 SOD-salt stock, we dissolved 289.98g decahydrous sodium-sulfate in 900ml e-pure water in a 1-liter bottle;  
823 then filter-sterilized each salt solution to prepare sterile stock.] We used different carboys to prepare salt-  
824 nutrient mixes for the different salt treatments (SOD, ALU). The nutrient concentration in each mix (Table  
825 S2) was sufficient such that plants did not need additional fertilization during each selection-cycle of 20-  
826 30 days during Generations 0-8 when we quantified plant fitness as above-ground biomass production, and  
827 plants even had sufficient nutrients to flower and grow seed during the 68 days of the last Generation 9  
828 when we quantified plant fitness as seed production. For both salt treatments, fertilizer-salt solutions had a  
829 pH = 3.75 before addition to soil, but because of the buffering capacity of PPC soil (natural pH = 5.5, see  
830 above), the hydrated soil had a pH of about 5.0-5.5 after autoclaving soils, using the pH-measurement  
831 procedure in ISO/FDIS 10390 (2005). After hydration of all pots, we immediately autoclaved all pots (to  
832 minimize the time that any live microbes in the soil could consume any of the nutrients), and we autoclaved  
833 in separate 1-liter flasks at the same time 800ml of each of the unused salt-nutrient solutions; these auto-  
834 claved salt-nutrient solutions were used later during planting, and as buffer (at half-concentration) to sus-  
835 pend microbiomes harvested from rhizospheres for microbiome-transfers (see *Planting & Microbiome-*  
836 *Harvest* below).

837 **Autoclaving of Soil:** After hydration of soil by carefully pouring exactly 94ml of fertilizer-salt solution  
838 into a pot, we leveled and smoothed the soil-surface in a pot with the bottom of a glass (same size as interior  
839 diameter of a pot); taped to each pot a label of autoclavable label-tape (Fisherbrand™) with a pre-written  
840 pot-number (#001-100 for pots of SOD-treatment; #101-200 for pots of ALU-treatment) to the top side of  
841 each pot (Figure S1); then used pre-cut pieces of aluminum foil to cap the top and wrap the bottom of each

## Artificial Selection on Microbiomes to Confer Salt-Tolerance to Plants

Mueller et al, bioRxiv, Draft 8Nov2019; please email comments to: umueller@austin.utexas.edu

842 pot to prevent possible microbial contamination during seed-  
843 stratification (see below *Planting & Stratification*). Wrapped  
844 pots were arranged vertically in large autoclave trays (67 pots  
845 per tray, 3 trays total), the trays were covered with sheets of  
846 aluminum foil, then all pots in these 3 trays were sterilized  
847 simultaneously in a large autoclave. Hydration, labeling and  
848 capping of a set of 200 pots needed typically 5–6 hours. The  
849 subsequent autoclaving procedure lasted about 10 hours over-  
850 night, starting in the evening with a first cycle of 35 minutes  
851 autoclaving (121C° temperature, 20 atm pressure) with a  
852 slow-exhaust phase lasting 90 minutes; followed by overnight  
853 exposure to high temperature in the unpressurized autoclave;  
854 followed in the morning by a second cycle of 35 minutes au-  
855 toclaving with a 90-minute slow-exhaust phase. This strin-  
856 gent autoclaving regime was sufficient to sterilize PPC soil,  
857 because plating on PDA-medium of about 0.5g soil (n=2 SOD  
858 pots, n=2 ALU pots) taken with a sterile spatula from the in-  
859 terior of such autoclaved pots produced no visible microbial  
860 growth within a month of incubation at room temperature. Af-  
861 ter cooling of autoclaved pots in the foil-covered trays at room  
862 temperature for at least 16 hours, we planted seeds into the  
863 sterilized soil (one seed per pot; see below *Planting*).

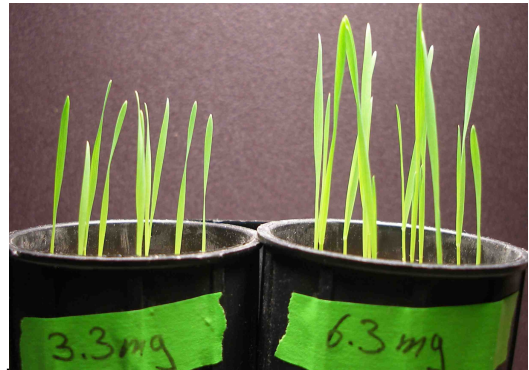

**Figure S2.** Pilot experiment illustrating growth variation of *B. distachyon* Bd3-1 plants growing under identical conditions from seeds weighing either 3.3mg or 6.3mg. The seed-weight range tested here includes about 90% of the 6000 seeds that we harvested for our microbiome-selection experiment. We used seeds of a narrow weight-window of only 0.1mg or 0.2mg for each microbiome-selection cycle (see Table S2), to help reduce within-generation and within-treatment variation in plant-phenotype (specifically here, reduce seed-weight-dependent maternal effects on phenotypes), Photo by UGM.

864 **Seeds Preparation & Binning of Seeds by Weight:** To have enough seeds for our 10-generation selection  
865 experiment, we first grew *Brachypodium distachyon* Bd3-1 plants under standardized light conditions (14h  
866 light, 10h dark) and room temperature in well-fertilized and well-watered greenhouse soil, harvested about  
867 6000 seeds from these plants, then dried and stored seeds at room temperature (see above *Preparation of*  
868 *Brachypodium distachyon* Seeds). For our experiment, we used only long-awn seeds; that is, we discarded  
869 any short-awn seeds positioned peripherally in inflorescences (spikelet), and we discarded also any mis-  
870 shapen or discolored seeds. We used only long-awn seeds because these kind of seeds grow in more stand-  
871 ardised central positions in a spikelet, because we could grasp an awn with a forceps during weighing and  
872 planting without risk of injuring a seed, and because we could plant seeds vertically into soil with only the  
873 awn protruding above the soil to reveal the exact location of a seed during later microbiome inoculation  
874 (see below *Seed Inoculation*). To weigh each seed accurately, we first removed any attached glumes to  
875 weigh only the seed with its awn. One experimenter pre-weighed each seed to bin seeds by weight to the  
876 nearest 0.1mg, then a second experimenter re-weighed all seeds in bins 4.5mg – 6.0mg again (i.e., each  
877 seed was weighed twice). To help reduce within-treatment variation in plant-phenotype (specifically here,  
878 reduce seed-weight-dependent maternal effects on plant-phenotypes, as illustrated in Figure S2), we used  
879 seeds of only a narrow weight-window for each microbiome-selection cycle. We used seeds of 5.9&5.8mg  
880 weight for the initial baseline Generation 0, then we used up seeds of bins of gradually decreasing seed-  
881 weight (5.9&5.8mg, 5.8&5.7mg, 5.6&5.5mg, ...), as shown in Table S2 for each microbiome-generation.

882 **Planting & Stratification:** For planting of seeds in sterile soil, we first surface-sterilized Bd3-1 seeds in a  
883 laminar flow-hood by gently shaking the seeds for 8 minutes in 10% bleach [Chlorox®; 4ml bleach added  
884 to 36ml autoclaved e-pure water in a 50ml Falcon tube; plus 4µl Tween80-surfactant (Sigma-Aldrich, Saint  
885 Louis, MO, USA) to promote wetting of seeds], then rinsing the seeds three times to wash off bleach (suc-  
886 cession of three 1-minute gentle shaking, each in 40ml e-pure autoclaved water in a 50-ml Falcon tube). In  
887 pilot tests, such surface-sterilized seeds placed on PDA-medium did not lead to bacterial or fungal growth.  
888 After rinsing, we blotted seeds on autoclaved filter paper, then air-dried the seeds in an open Petri dish in  
889 the flow-hood while preparing the flow-hood for planting inside the hood. To plant one seed into the center  
890 of a pot, we removed the aluminum-foil lid from a pot inside the flow-hood, pushed a narrow hole into the  
891 center of the soil with a flame-sterilized fine-tipped forceps (#5 forceps), then inserted a seed into that hole

## Artificial Selection on Microbiomes to Confer Salt-Tolerance to Plants

Mueller et al, bioRxiv, Draft 8Nov2019; please email comments to: umueller@austin.utexas.edu

892 such that the seed was positioned vertically in the soil and only the awn was protruding above the soil (i.e.,  
893 the pointed tip of a seed was just below the soil surface). Because seeds used for a selection cycle had been  
894 binned to within 0.1mg weight (i.e., all seeds were of same size for each selection cycle), seeds were there-  
895 fore planted at the same depth (to within about 0.5-1.0 mm identical depth), and any differences in initial  
896 germination rate (i.e., appearance of the shoot at soil surface) was unlikely due to differences in planting  
897 depth between seeds. To solidify the soil around each seed, we applied 4ml autoclaved salt-nutrient solution  
898 (same concentration that was used to hydrate soil in a given selection-cycle; Table S2) with a 5ml pipette  
899 to flush soil into the hole and completely cover each seed (excepting the awn protruding vertically above  
900 the soil surface). We covered each pot with a translucent, ethanol-sterilized lid (inverted Mini Clear Plastic  
901 Bowl 40ct; Party City, Rockaway, NJ, USA). The lids prevented entry of airborne microbes into each pot,  
902 but did not seal pots completely and permitted some gas exchange. Each lid measured 5.7cm diameter x  
903 3.8cm height, and fit snugly only each pot such that a series of 50 capped pots could be kept in a rack (D50T  
904 rack, see above) without the lids interfering with each other. We placed each rack of 50 capped pots into its  
905 own ethanol-sterilized plastic tub (Jumbo Box; Container Store, Coppell, TX), covered the box with a boxes  
906 plastic lid, then sealed the spaces at the side of each lid by wrapping lid&tub with a 2-meter-long strip of  
907 10-cm-wide Parafilm to prevent entry of contaminants during subsequent cold-storage for stratification of  
908 seeds. We moved each tub into cold-storage immediately after completing the planting of 50 pots. For  
909 stratification, we stored the tubs with planted seeds in a 5°C cold-room for about 5 days (range 4-10 days,  
910 the duration differing slightly between selection-cycles because of scheduling-constraints affecting plant-  
911 ing). Planting of a set of 200 seeds (4 racks of 50 pots each) using the above methods needed typically 4.5-  
912 5.5 hours.

913 **Preparations for Microbiome-Harvesting:** To prepare salt-nutrient buffer-solution for microbiome har-  
914 vesting, we used the autoclaved salt-nutrient solution that we had prepared for hydration of soil for a par-  
915 ticular selection-cycle (Table S2), then diluted the solution to half-concentration by addition of an equal  
916 volume of autoclaved e-pure water. We decided to use for microbiome-harvesting the salt-nutrient solution  
917 at half-concentration, because we were concerned that the full-concentration may have too high osmolarity  
918 compared to the osmolarity that may exist in the soil after weeks of root- and microbiome-growth in the  
919 soil; this dilution precaution may not have been necessary, and it may be possible to propagate microbiomes  
920 even when using full-concentration of salt-nutrient solution. Aliquots of 45ml of the sterile, half-concen-  
921 tration salt-nutrient buffer were added to 50ml Falcon tubes in a laminar-flow hood, and these tubes were  
922 then pre-labeled with relevant information (SOD vs ALU treatment; Generation #; date of microbiome-  
923 harvest) to save time on the actual day of microbiome-harvest. To sterilize microfilters needed for fraction-  
924 ation of harvested microbiomes (2µm Whatman™ filters; model Puradisc 25 GD2 Syringe Filter, 25mm  
925 diameter; Whatman PLC, United Kingdom), we wrapped filters individually in aluminum-foil, then auto-  
926 claved these in a 15min-exposure fast-exhaust cycle. On the evening before the day of microbiome-harvest,  
927 we set up a custom-made flow-hood on a bench in our Conviron growth-chamber, sterilized the inside of  
928 the hood by spraying liberally with 100% ethanol, then allowed the flow of clean air to purify the inside of  
929 the hood overnight. Our custom-made hood was constructed of a large plastic tub placed on its side, with  
930 the lid cut half so that a lid-portion affixed to the tub could shield the inside of the hood from above (like a  
931 sash on a regular flow-hood), whereas the bottom half was kept open to permit access to the inside of the  
932 hood. To generate a flow of clean air through the hood, we cut a large hole into the top of the hood (i.e.,  
933 one of the original sides of the tub now resting on its side) to fit into that hole the top portion of an air  
934 purifier (model HPA104 Honeywell HEPA Allergen Remover, with HEPA filter of 0.3 microns; Honeywell  
935 International Inc., Morris Plains, NJ, USA). We operated the purifier at medium flow-setting, which gen-  
936 erated an even flow through the hood and minimized any air-vortices that could draw impure air into the  
937 hood at high flow-setting. In a pilot test, Petri-plates with PDA-medium, exposed overnight to the flow  
938 inside our hood, revealed no visible growth within seven days of incubation of these plates at room tem-  
939 perature. Early on a day of a between-generation microbiome-transfer, we moved the tubs with racks of  
940 planted, cold-stratified seeds from the cold-room into our growth-chamber, to have sufficient time for com-  
941 pletion of all microbiome-harvests and -transfers (the total time needed on the day of microbiome harvest

## Artificial Selection on Microbiomes to Confer Salt-Tolerance to Plants

Mueller et al, bioRxiv, Draft 8Nov2019; please email comments to: umueller@austin.utexas.edu

942 for completion of harvests/transfers of all lines was 8-10 hours, plus an additional 2 hours for distribution  
943 of pots in pre-determined randomized arrangements across 8 racks used to support pots in the growth-  
944 chamber). We began microbiome-harvests and -transfers immediately after moving pots into the growth  
945 chamber, so transferred microbiomes would interact with seeds at the very early stages of germination.

946 **Phenotyping of Plants; Quantification of Above-Ground Biomass:** To select the two best-growing  
947 plants from a particular selection line on the day of microbiome-harvest and -transfer, we moved all eight  
948 pots from a selection line into a separate, ethanol-sterilized rack, recorded the number of leaves of each  
949 plant, and arranged plants visually by apparent above-ground biomass into a size-ranked series (Figure S3).  
950 We chose visual sizing rather than weighing for phenotyping of plants, because visual evaluation of all  
951 eight plants in a selection-line needed only about 5-10 minutes (including recording the number of leaves  
952 for all eight plants), and because microbiomes could be harvested immediately after visually identifying a  
953 particular plant for microbiome harvest without first having to cut and weigh above-ground biomass of all  
954 plants in a selection line. We harvested rhizosphere microbiomes from only those two plants within a se-  
955 lection line that we visually judged to have grown the largest and second-largest above-ground biomass  
956 (Figure S3).

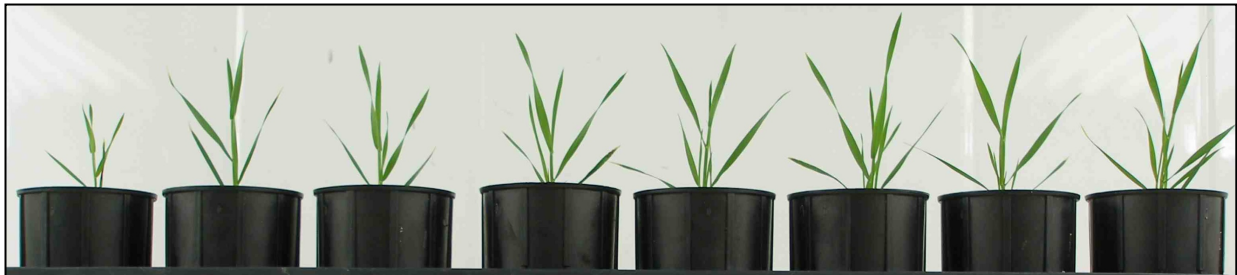

**Figure S3.** Plants of the same selection-line ranked by visually estimating above-ground biomass. The 8 plants were grown in 8 different racks (one plant per rack) in randomized positions in each rack, and the 8 plants were moved to a separate ethanol-sterilized rack for visual comparison immediately before microbiome harvesting from the two largest plants. See text for further details on *Phenotyping of Plants; Quantification of Above-Ground Biomass*. Photo by UGM.

957 To test the accuracy of our visual rankings, we later compared these rankings with dry above-ground (shoot)  
958 biomass. To weigh shoot-biomass, we cut each plant at soil-level at the time of microbiome harvesting,  
959 stored above-ground biomass for drying in an individual paper envelope (Coin Envelope 8cm x 14cm),  
960 dried these envelopes/plants for at least two weeks at 60°C in a drying oven, then weighed dry biomass for  
961 each plant to the nearest 0.1mg. Although we judged above-ground plant-biomass visually on the day of  
962 microbiome harvesting, of the 80 lines judged during our entire experiment (5 SOD-lines + 5 ALU-lines  
963 judged each Generation, times 8 Generations; Table S1), we picked for microbiome harvest the combination  
964 of largest (#1) and second-largest (#2) plant in 56.25% of the cases; the largest (#1) and third-largest (#3)  
965 plant in 27.50%; the largest (#1) and fourth-largest (#4) plant in 6.25%; the second-largest (#2) and third-  
966 largest (#3) in 5.00%; the second-largest (#2) and fourth-largest (#4) in 5.00%; and never any lower-ranked  
967 combination. In cases when we did not identify visually the combination of #1 and #2 plants as later deter-  
968 mined by dry weight, the slightly lighter #3 or #4 plants were typically within 0.2-4mg (0.5-9% of total  
969 dry-weight) of the two best-growing plants in the same selection-line (Table S1). Moreover, because har-  
970 vested microbiomes of the two chosen plants were mixed for propagation to the next microbiome-genera-  
971 tion (see below *Microbiome Mixing*), we harvested in 100% of the cases the microbiomes from either the  
972 best-growing or second-best growing plant into the mixed microbiome that we then propagated to the next  
973 microbiome generation (i.e., a microbiome of one of the two best-growing plants was always included in  
974 the propagated microbiome mix). In sum, therefore, our method to visually judge plant-size was both time-  
975 efficient (about 5-10 minutes needed to visually size all plants in a selection-line and record number of  
976 leaves for each plant), and our method was also accurate to identify those plants that had grown biomass  
977 well above-average within any given selection-line (i.e., our methods were accurate to visually identify  
978 plants that were likely associated with microbiomes that conferred salt-tolerance to plants).

## Artificial Selection on Microbiomes to Confer Salt-Tolerance to Plants

Mueller et al, bioRxiv, Draft 8Nov2019; please email comments to: umueller@austin.utexas.edu

979 In some cases, on the day of microbiome-harvest, more than two plants  
980 of the same selection line appeared to have the largest above-ground bi-  
981 omass. To decide between those plants for microbiome-harvest, we con-  
982 sidered as a second criterion also the growth trajectory recorded from the  
983 day of germination to the day of microbiome-harvest, choosing then the  
984 plant with the best growth-trajectory. We quantified growth trajectory of  
985 plants during each generation with three methods: (i) measuring the  
986 length of the first leaf on Days 2-5; (ii) after Day 5, recording the number  
987 of leaves grown by a plant every other day up to a time when plants had  
988 grown about 10 leaves; and (iii) once plants had grown about 10 leaves,  
989 visual ranking of relative plant size (visual appearance of overall bio-  
990 mass) on a 10-point scale from 1-9, using the protocol below. **Length of**  
991 **first leaf:** After moving pots from the cold-room into the growth-cham-  
992 ber, the fastest-growing shoots became visible, as they pushed through  
993 the soil, after about 44 hours in the early, low-salt Generations, but  
994 growth rate was somewhat slower in the later, high-salt Generations  
995 when the first shoots became visible after 55-70 hours (Table S1). To  
996 quantify this early growth each selection-cycle, we estimated length of  
997 the first leaf during Days 2 & 3 visually without lifting the translucent  
998 lids from pots, but measured leaf-length on Days 4 & 5 to the nearest  
999 millimeter with an ethanol-sterilized ruler (millimeter scale printed on paper strip; Figure S4) held next to  
1000 the growing leaf, using a different sterile paper-ruler for each plant so as not to transfer microbes between  
1001 pots. In blind, repeat evaluations (Table S1), the visual sizing on Days 2 & 3 is accurate to about  $\pm 0.5\text{mm}$   
1002 for leaves less than 15mm tall, and accurate to about  $\pm 2\text{mm}$  for plants larger than 25mm. Despite the some-  
1003 what lower accuracy of the visual leaf-length estimation compared to the precise measurement with a ruler,  
1004 we chose to visually size plants on Days 2 & 3 because that method allowed us to leave the pots covered  
1005 with the translucent lids, thus preventing any influx of microbes when lifting a lid; plants therefore inter-  
1006 acted only with the experimentally-transferred microbiomes for a total of 4 days without any influx of  
1007 additional microbes, thus facilitating priority effects in microbiome recruitment into the initial microbiome  
1008 assembled by a plant. **Counting leaf number:** The fastest-growing plants showed growth of a second leaf  
1009 typically late on Day 5 (in the early low-salt Generations) or on Day 6 (in the later high-salt Generations).  
1010 We counted the number of leaves regularly after Day 6 (Table S1), typically every other day. Because  
1011 different plants with the same number of leaves differed in size of their youngest leaves (e.g., on the same  
1012 day, some plants showed beginning growth of leaf #3, other plants extensive growth of leaf #3), we also  
1013 recorded during these counts the relative size of each plant's youngest leaf on a 5-point scale [see Table  
1014 S1b&c: double-minus "--" (= well-below average for plants with that particular leaf number); single-minus  
1015 "-" (= below average); average; single-plus "+" (= above average); double-plus "++" (= well above aver-  
1016 age)]. **Above-ground biomass estimated on a 10-point scale ranging from 0-9:** This third method gave  
1017 the most precise estimate of above-ground biomass once plant had grown more than 10 leaves, and we used  
1018 this method therefore every generation to obtain a relative measure of above-ground biomass a few days  
1019 before the microbiome-harvesting. An experimenter first looked over all plants to gain an impression of the  
1020 largest plants, of the average-sized plants, and of the smallest plants, then subdivided the entire range on a  
1021 subjective 0-9 point-scale, with plants of average size to be scored as 4.5 on the 0-9 point-scale. Evaluating  
1022 all plants rack-by rack, the experimenter scored and recorded sizes of all 200 plants in a Generation, then  
1023 blindly re-scored all plants again rack-by-rack, then calculated an average between the two scores for each  
1024 plant. Comparison of the first and second size-values for each plant (see Table S1b&c) showed that about  
1025 70% of the blind re-scoring were identical to the first score; and in most of the remaining 30% cases, the  
1026 scores of the same plant differed by only a 1-point-value, and only in very exceptional cases (<2%) the  
1027 scores differed by a 2-point value. Because of this high repeatability of this scoring method, we used this  
1028 method every generation to obtain estimates of the relative above-ground biomass of each plant 1-3 days  
1029 before each day of microbiome-harvesting.

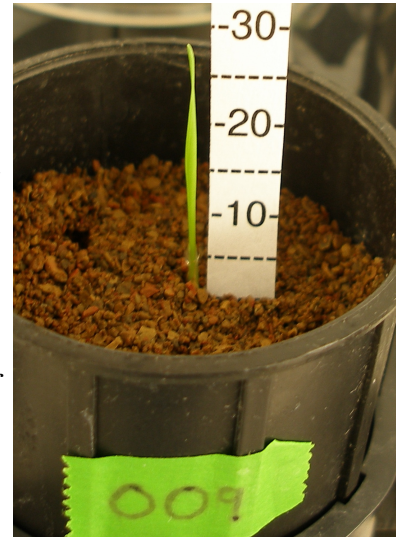

**Figure S4.** Measuring length of the first leaf on Day 3, using an ethanol-sterilized dry paper-strip with a millimeter-scale. Photo by UGM.

## Artificial Selection on Microbiomes to Confer Salt-Tolerance to Plants

Mueller et al, bioRxiv, Draft 8Nov2019; please email comments to: umueller@austin.utexas.edu

1030 **Microbiome-Harvesting from a Rhizosphere & Microbiome Mixing:** We performed all steps of micro-  
1031 biome harvest and microbiome transfer in a clean-air flow-hood (see above) set up on a bench inside our  
1032 growth-chamber (i.e., we did not have to move microbiomes/pots of selection lines outside the growth  
1033 chamber), and we sterilized hands and work-surfaces regularly with 100% ethanol to prevent contamination  
1034 and cross-contamination of samples. After choosing the two plants with the greatest above-ground biomass  
1035 (see above *Phenotyping of Plants*), we cut each plant at soil level with ethanol-sterilized scissors, stored the  
1036 above-ground portion in an envelope for drying, and harvested rhizosphere microbiomes immediately to  
1037 minimize microbiome changes in the absence of plant-control in the rhizosphere. To extract the root-system  
1038 from a pot (Deepot) with minimal contamination, we held the shoot-stub at the soil surface with ethanol-  
1039 sterilized forceps, tilted the pot such that PPC-soil would gradually loosen and fall out when squeezing the  
1040 plastic pot, until the root-structure could be extracted as a whole by gentle pulling at the main root with the  
1041 forceps. In most cases, the entire root structure could be extracted whole, with some loss of fine roots  
1042 embedded in spilled soil. Because we were interested in harvesting microbiomes that were in close physical  
1043 association with a plant (i.e., we were interested in rhizoplane bacteria, plus any endophytic bacteria if they  
1044 were released during root processing as a result of any root damage), we discarded any soil adhering loosely  
1045 to the roots. We dislodged loosely adhering soil by knocking the root-system gently against the wall of an  
1046 autoclaved aluminum-pan (e.g., Hefty EZ Foil Roaster Pan; 32cm length x 26cm width, vertical depth  
1047 11cm) such that any dislodged soil would fall into the pan without the roots contacting any discarded soil.  
1048 We then cut off the top 2 cm of the root-system (i.e., roots close to the soil surface), then transferred the  
1049 remaining root-system into a 50 ml Falcon tube filled with 45 ml of salt-nutrient buffer (the same buffer  
1050 used also to hydrate soils of the subsequent microbiome-generation, but diluted to half-concentration to  
1051 suspend harvested microbiomes; see above *Preparations for Microbiome-Harvesting*). We repeated this  
1052 process with the second plant chosen for microbiome-harvest from the same selection line, and added this  
1053 second root-system to the same Falcon tube as the first root-system. Combining both root-systems for mi-  
1054 crobiome-harvesting generated a so-called mixed-microbiome collected from two ‘mother rhizospheres’  
1055 (see *Mixed Microbiome Propagation*; and Box 3 in Mueller & Sachs 2015), which we then transferred  
1056 within the same selection line to all eight ‘offspring plants’ of the next microbiome-generation.

1057 **Microbiome-Fractionation with Microfilters:** To dislodge microbes from roots and from soil-particles  
1058 adhering to roots, we turned a closed Falcon tube upside-down 50 times, then permitted the solids to settle  
1059 in the bottom of the tube for 1 minute. A 1cm-deep sediment of PPC-soil particles typically accumulated  
1060 in the bottom cone of a Falcon tube, with the roots settling on top of this sediment, and small particles and  
1061 colloids remaining suspended in the salt-nutrient buffer. We aspirated 20 ml of this suspension with a sterile  
1062 20 ml syringe (external syringe diameter fitting into a 50 ml Falcon tube), then attached to the syringe’s  
1063 Luer-lock a 2 µm Whatman microfilter (model Puradisc 25 GD2 Syringe Filter, 25 mm diameter; Whatman  
1064 PLC, United Kingdom), then filtered the aspirated suspension into an empty sterile 50 ml Falcon tube.  
1065 Making sure that the exterior of the syringe did not become contaminated during this first filtering, we  
1066 repeating this step with the same syringe to filter another 15-20 ml of the suspension, then mixed the com-  
1067 bined filtrates by inverting the Falcon tube several times. The total volume of 35-40 ml filtrate was suffi-  
1068 cient to inoculate 8 ‘offspring plants’ each with 4 ml filtrate (total of 8 x 4 ml = 32 ml needed). In pilot  
1069 tests, plating on PDA-medium 10 µL of this filtrate (2µm filter) yielded thousands of bacterial colony-  
1070 forming-units (CFUs) but no fungal CFUs within 24 hours growth; whereas plating on PDA-medium 50  
1071 µL of this same filtrate that had been filtered a second time with a 0.2µm filter (VWR Sterile Syringe Filter,  
1072 0.2µm polyethersulfone membrane, 25mm diameter; Catalog #28145-501; retains even the small-sized *Bre-*  
1073 *vundimonus diminuta*) did not yield any visible microbial growth on PDA plates kept for 7 days at room  
1074 temperature. These results justified addition of a third control-treatment in Generation 9 (0.2µm filtration  
1075 of suspension) to test growth-promoting effects of chemicals and viruses co-harvested with the harvested  
1076 microbiomes (see below *Crossing Evolved SOD- and ALU-Microbiomes with SOD- and ALU-Stress*). Alt-  
1077 hough a 0.2 µm filter may not eliminate ultra-small bacteria (e.g., Luef *et al* 2015; we did not use filters of  
1078 smaller pore size because it was too difficult to press liquid through such filters with a hand-held syringe),  
1079 our control comparison between 2.0 µm-filtered and 0.2 µm-filtered bacterial microbiomes can still test

## Artificial Selection on Microbiomes to Confer Salt-Tolerance to Plants

Mueller et al, bioRxiv, Draft 8Nov2019; please email comments to: umueller@austin.utexas.edu

1080 whether the bulk of the bacterial microbiome (in size range 0.2-2.0  $\mu\text{m}$ ) or alternatively any smaller-sized  
1081 organisms (viruses, ultra-small bacteria) plus solutes in the soil are responsible for conferring salt-tolerance  
1082 to plants in our experiment.

1083 **Inoculation of Seeds; Transfer of Microbiomes to Plants of the Next Microbiome-Generation:** During  
1084 planting, the 200 pots of each microbiome-generation had been ordered numerically in the 4 racks used for  
1085 stratification in the cold-room, so it was easy to locate in these racks a pot with a particular number that had  
1086 been assigned to a specific selection-line and needed to be inoculated with a microbiome. To inoculate a  
1087 seed planted in a particular pot, we moved the pot into our clean-hood in our growth chamber, opened the  
1088 pot's translucent cap inside the hood (using one hand to hold the pot while opening the cap with thumb and  
1089 index finger of that same hand), then used a 5 ml pipetter to transfer 4 ml of the microbiome-filtrate to the  
1090 center soil in a pot where a seed had been planted before vernalization/stratification. We spread the 4 ml  
1091 filtrate across an area with a radius of about 5mm around a seed, applying some of the filtrate directly onto  
1092 the seed (the exact location of the seed was indicated by its awn protruding above the soil; see *Planting*  
1093 above), and we spread some of the filtrate also in a circular motion onto the surrounding soil within 5 mm  
1094 distance of a seed. To keep the filtrate well-mixed during the time needed to inoculate all 8 'offspring soils'  
1095 of the same selection-line, we repeatedly mixed the filtrate in the Falcon tube with the pipette-tip before  
1096 aspirating a 4 ml-aliquot to inoculate the next pot. We then taped a small tag of labeling-tape to the lid of  
1097 each pot that had received an inoculum (as a check to verify later that all pots had received an inoculate, no  
1098 pot was accidentally skipped, or any pot was accidentally inoculated twice), then we returned the pot to its  
1099 appropriate position in one of the four racks. After inoculation of all 200 plants within a Generation, all  
1100 pots were distributed among the 8 racks used to support plants in the growth chamber (see below *Random-*  
1101 *ization of Pot-Positions in Racks*).

1102 Each pot was capped for first 4 days to promote priority effects during microbiome establishment (i.e.,  
1103 capping prevented immigration of extrinsic microbes into the soils/microbiomes for the first 4 days; see  
1104 above *Planting*), but all caps were removed on Day4 because the tallest plants (35-40mm tall on Day4)  
1105 were close to reaching the cap-ceiling. We monitored growth during first 5 days (see above *Phenotyping*)  
1106 by recording length of the first leaf on Days 2-5, and recording day of appearance of the second leaf (typi-  
1107 cally on Days 6 or 7; Table S1). Seeds that did not germinate or that germinated very late (i.e., no above-  
1108 ground growth visible by Day 4) were extracted from pots with forceps and inspected. Most of these seeds  
1109 had failed to grow both a rootlet and shoot by Day4, but some seeds had grown a rootlet but no shoot. In a  
1110 typical microbiome-generation, about 88-100% of the plants showed a visible shoot within the first 3 days  
1111 (Table S1). Germination rates were therefore good overall, and most lines had the planned 8 replicates  
1112 (sometimes 7 replicates, rarely 6 replicates, if some seeds failed to germinate; see Table S1). Germination-  
1113 rates were often minimally higher in the Null-Control treatments compared to other treatments of the same  
1114 soil-stress (slightly fewer non-germinating seeds in Null-Controls), and, across all plants, germination-rates  
1115 were minimally higher in ALU-soil than in SOD-soil (see Tables S1a-c); we did not analyze these trends  
1116 for statistical significance because differences were minimal, but we simply note here these general patterns  
1117 became apparent only when pooling information across all 10 selection cycles.

1118 **Randomization of Pot-Positions in Racks in Growth-Chamber:** Deepots were supported in D50T racks  
1119 (Stewe & Sons, Tangent, Oregon, USA). Each rack can hold a total of 50 pots (5 rows of 10 pots each), but  
1120 to prevent contact of leaves from different plants and to reduce accidental between-pot transfer of microbes  
1121 during watering (see below *Watering*), we used only 25 rack-positions (25 pots per rack, total of 8 racks,  
1122 for a total number of 200 pots per selection cycle). Pots within a selection line were first assigned by block-  
1123 ing to particular rack (e.g., of the 8 replicates within a selection line, one replicate was assigned to each of  
1124 the 8 racks). Within each rack, however, we randomly assigned pot positions, using the *Random Sequence*  
1125 *Generator* option at Random.Org ([www.random.org/sequences/](http://www.random.org/sequences/)). For Generations 0-8 (growth cycles 0-8),  
1126 Tables S1a&b lists pot positions (#1-#25) from different treatments within each rack (Rack #1-8), corre-  
1127 sponding to the following pot arrangement:



## Artificial Selection on Microbiomes to Confer Salt-Tolerance to Plants

Mueller et al, bioRxiv, Draft 8Nov2019; please email comments to: umueller@austin.utexas.edu

|     |     |     |     |     |     |     |     |     |     |
|-----|-----|-----|-----|-----|-----|-----|-----|-----|-----|
| #1  |     | #2  |     | #3  |     | #4  |     | #5  |     |
|     | #6  |     | #7  |     | #8  |     | #9  |     | #10 |
| #11 |     | #12 |     | #13 |     | #14 |     | #15 |     |
|     | #16 |     | #17 |     | #18 |     | #19 |     | #20 |
| #21 |     | #22 |     | #23 |     | #24 |     | #25 |     |

1128 For the final Generation 9 when we added two more control-treatments (details below), we randomized 400  
1129 pot-positions by first assigning a pot to one of 8 racks, then randomizing position within each of the 8 racks  
1130 (50 pots/rack; the position-numbering of pots shown for Generation 9 in Table S1c for each rack is num-  
1131 bered consecutively, starting in left top corner, without leaving empty spacer-slots between pots).

1132 The 8 racks were positioned in two groups of 4 racks each on two comparable shelves at either side of the  
1133 growth chamber. Within each selection cycle, we rotated these 8 racks in clockwise rotation each day (mov-  
1134 ing one rack from right shelf to left shelf, and one rack from left to right shelf), and at the same time we  
1135 also turned each rack (such that the rack-side facing the chamber wall one day faced the chamber center the  
1136 next day). This rotation-turning scheme aimed to minimize possible environmental influences dependent  
1137 on location of a rack on the two shelves, and to reduce any minimal differences in light-level, air-circulation,  
1138 or any such uncontrolled environmental factors that may exist between different positions on the two  
1139 shelves in our growth chamber. Despite our effort to minimize rack effects through daily rack-rotation and  
1140 rack-turning, as well as randomization of processing order (e.g., watering, phenotyping, microbiome-har-  
1141 vesting), we had occasionally racks of poorer or better plant growth (e.g., Rack 7 of Generation 9 had lower  
1142 average seed production compared to other racks, because many plants in that rack did not flower, or flow-  
1143 ered late). We do not know the exact causes for occasional small rack-effects, because we believe we treated  
1144 plants across all racks equally.

1145 **Starter Inoculum for Microbiomes at Beginning of the Experiment for Baseline Generation 0:** We  
1146 used a single inoculum-batch to inoculate all replicate pots of the initial baseline Generation 0. To prepare  
1147 that inoculum, we filtered bacterial communities from a mix of roots and adhering soil taken from three  
1148 principal sources: (a) root-systems with adhering soil of three local grass species (*Bromus* sp., *Andropogon*  
1149 sp., *Eragrostis* sp.) collected into individual plastic bags on 3.Jan.2015 (about 90 minutes before microbi-  
1150 ome harvesting) at restored native habitat at Brackenridge Field Lab of the University of Texas at Austin  
1151 (www.bfl.utexas.edu/); (b) root-systems with adhering soil of 40 16-day-old *B.distachyon* Bd3-1 plants  
1152 grown in PPC-soil Deepots as part of a pilot experiment quantifying the effect of salt in soil on the growth  
1153 rate of *B. distachyon* (see below *Salt Treatments*); and (c) old root-systems with adhering soil of 15 Bd3-1  
1154 plants grown in PPC-soil Deepots, but that had been stored in the soil/Deepots in a cold-room (6°C) for 7  
1155 months after completion of a previous low-nutrient microbiome-selection experiment. We combined roots  
1156 and rhizosphere soils from these three sources in order to capture a diversity of microbes into our starter  
1157 inoculum, and we included Bd3-1 rhizospheres in order to capture specific microbial taxa that may be  
1158 readily recruited by *B. distachyon* into its rhizosphere microbiomes. We suspended this mix of roots and  
1159 rhizosphere soil in 200 ml e-pure water, blended the mix for 30 seconds in an autoclaved Waring blender  
1160 to generate a liquid slurry, allowed the solids to settle in the blender for 1 minute, then decanted the super-  
1161 natant into a separate autoclaved beaker. Adding each time 200 ml e-pure water, we repeated this blend-  
1162 ing/decanting with the remaining slurry three more times to collect a total of about 600 ml supernatant.  
1163 Using vacuum filtration, we pre-filtered this supernatant in a Buchner funnel through filter paper (Ahlstrom  
1164 filter paper S02-007-42), eliminating larger particles suspended in the supernatant. To harvest only bacterial  
1165 microbiome components (and viruses) from this pre-filtrate, we filtered the supernatant a second time in a  
1166 laminar-flow hood, using a 60 ml syringe fitted with a 2 µm Whatman™ microfilter (Puradisc 25 GD2  
1167 Syringe Filter, 25 mm diameter; Whatman PLC, United Kingdom) to generate the bacterial mix for inocu-  
1168 lation of replicate pots of our initial baseline Generation 0. Because the Puradisc filters became clogged  
1169 after filtration of about 70-100 ml supernatant, we used 8 Puradisc filters to process about 600 ml of filtrate.

## Artificial Selection on Microbiomes to Confer Salt-Tolerance to Plants

Mueller et al, bioRxiv, Draft 8Nov2019; please email comments to: umueller@austin.utexas.edu

1170 We reserved 500 ml of this filtrate for inoculation of 160 randomly-assigned pots in a Bacterial-Inoculate  
1171 treatment (80 Bacterial-Inoculate with SOD soil, 80 Bacterial-Inoculate with ALU soil), and filtered the  
1172 remaining 100 ml with 0.2  $\mu\text{m}$  filters (VWR Sterile Syringe Filter, 0.2 $\mu\text{m}$  polyethersulfone membrane, 25  
1173 mm diameter; Catalog #28145-501) for inoculation of 40 pots in Null-Control treatments (20 Null-Control  
1174 with SOD soil, 20 Null-Control with ALU soil). The Null-Control treatments controlled for, after elimina-  
1175 tion of bacteria, the effect of any chemicals and viruses that may have been co-harvested from rhizosphere  
1176 roots and soils. Seeds in the Bacterial-Inoculum and the Null-Control treatments were inoculated following  
1177 the procedure described above (see *Inoculation of Seeds*), except that each seed of Generation 0 received 2  
1178 ml inoculate, whereas each seed of subsequent Generations 1-9 received 4 ml inoculate transferred between  
1179 generations. During inoculation of seeds, we mixed the stock filtrates regularly to prevent bacterial sedi-  
1180 mentation and to insure standardized inoculation of all replicates in a treatment. We needed about 3 hours  
1181 to complete the entire process from root collection to conclusion of all filtration steps, and another 2 hours  
1182 to apply inoculate-aliquots of the filtrates to each of the assigned pots. We then moved all pots immediately  
1183 into our growth chamber, and set out all 200 pots of Generation 0 into randomized positions in 8 racks (see  
1184 above *Randomization of Pot Positions*; Table S1).

1185 To test for live bacteria in our 2  $\mu\text{m}$  filtrate used as the Starter Inoculum, we plated on PDA-medium (2  
1186 replicate plates) 10  $\mu\text{L}$  each of the 2  $\mu\text{m}$  filtrate and maintained plates at room temperature; the plates  
1187 showed thousands of bacterial colony-forming-units (CFUs) within 24 hours, but no fungal growth within  
1188 7 days. To test for absence of live bacteria in our 0.2  $\mu\text{m}$  filtrate, we plated on PDA-medium (3 replicate  
1189 plates) 50  $\mu\text{L}$  each of the 0.2  $\mu\text{m}$ -filtrate; these platings did not yield any visible growth on the PDA plates  
1190 kept for 7 days at room temperature. These results indicate (i) a great abundance of live bacteria (and ap-  
1191 parently no live fungi) in our initial inoculum, and (ii) elimination by the 0.2  $\mu\text{m}$  filters of live bacteria that  
1192 would be apparent when plating out such filtrate on PDA plates. The latter justified our use of a third  
1193 control-treatment in Generation 9 (0.2  $\mu\text{m}$  filtration of suspension to test growth-promoting effects of chem-  
1194 icals and viruses co-propagated with the harvested bacterial microbiomes; see below).

1195 **Selection of Microbiomes from Generation 0 to Inoculate Plants from Generation 1:** At the start of  
1196 our experiment, we did not assign microbiomes (i.e., pot numbers) from Generation 0 to specific selection  
1197 lines, to permit selecting the best-growing plants from Generation 0 to contribute microbiomes to the se-  
1198 lection-lines starting with Generation 1. We chose this particular assignment rule because random assign-  
1199 ment to selection lines would result in some cases for a poorly-growing plant to contribute microbiomes to  
1200 Generation 1, and we wanted to increase the chance of obtaining a response to microbiome-selection in the  
1201 fewest rounds of selection. To select plants for harvesting and propagation of rhizosphere microbiomes, we  
1202 ranked, separately for plants in the SOD and ALU treatments, the plants in the Bacterial-Inoculate treat-  
1203 ments of Generation 0 by relative size, then picked the 10 best-growing plants of each salt-treatment to  
1204 contribute microbiomes to the selection-lines that we started with Microbiome-Generation 1 (Table S1).  
1205 On Day 22 of Generation 0 (day of microbiome harvest and microbiome transfer; Table S1), we first ranked  
1206 plants by relative size-scores (i.e., average size-score averaged across three scores received by a plant on  
1207 Days 18, 19, 20; see protocol *Above-Ground Biomass Estimated on a 10-Point Scale*), then used number  
1208 of leaves recorded on Day 21 as a second criterion to differentiate between plants of equal average size-  
1209 score. Among the 10 best-growing plants within each of the SOD and ALU salt-treatments, we paired plants  
1210 randomly to generate 5 combinations (2 plants each) for mixing of harvested microbiomes within each pair  
1211 (i.e., harvested root-systems were combined from the two plants to harvest a mixed microbiome from both  
1212 plants, as described above for *Microbiome Mixing*). Within each of the SOD and ALU treatments, the 5  
1213 mixed microbiomes from Generation 0 were assigned randomly to 5 SOD and 5 ALU selection lines (each  
1214 with 8 ‘offspring microbiome’ replicates per line) that started with Generation 1. Microbiomes were har-  
1215 vested and processed from chosen rhizospheres as described above. At the end of Generation 0, as well as  
1216 at the end of each subsequent Generation, we cut all plants at soil level to preserve above-ground growth  
1217 for later weighing of dry biomass for each plant (Table S1; see also above *Phenotyping*).

## Artificial Selection on Microbiomes to Confer Salt-Tolerance to Plants

Mueller et al, bioRxiv, Draft 8Nov2019; please email comments to: umueller@austin.utexas.edu

1218 **Salt- and Control-Treatments in Generation 0-9; Sample Sizes Per Treatment:** Starting with Genera-  
1219 tion 1 and continuing until the last Generation 9, we included the two aforementioned salt-treatments (SOD  
1220 and ALU soil) with 5 *SOD Microbiome-Selection* Lines (8 replicates each, for a total of 40 replicates) and  
1221 with 5 *ALU Microbiome-Selection* Lines (8 replicates each, for a total of 40 replicates). Also starting with  
1222 Generation 1 and continuing until the last Generation 9, we included two control treatments for each of the  
1223 SOD and ALU treatments, *Null-Control* (on SOD- and on ALU-soils) and *Fallow-Soil Microbiome Prop-*  
1224 *agation* (on SOD- and on ALU-soils). **Control 1, Fallow-Soil Microbiome Propagation:** For this control,  
1225 we harvested microbiomes from fallow soil (from pots without a plant), then propagated the harvested  
1226 microbiome to sterile fallow soil to perpetuate ‘Fallow-Soil Microbiomes’ in the absence of plant influences  
1227 (e.g., absence of plant secretions into the soil). Fallow-soil pots were treated throughout each selection-  
1228 cycle exactly like pots with plants; for example, these fallow-soil pots received the same amount of water  
1229 whenever all other pots were watered. Each Fallow-Soil-Line had only one replicate pot, so a microbiome  
1230 harvested from fallow-soil was propagated to a single pot of the next selection-cycle to continue a particular  
1231 Fallow-Soil-Line; a portion of the same microbiome harvested from fallow-soil was also transferred to pots  
1232 with plants of the next cycle to assay the effect of a harvested fallow-soil-microbiome on plant growth (but  
1233 those microbiomes were later not propagated to subsequent Generations; i.e., these inoculations of control  
1234 plants aimed at assaying the effect of un-selected fallow-soil-microbiomes on plant growth under the in-  
1235 creasing salt stress that we increased stepwise between Generations; see above *Logic of Salt-Stress Ramp-*  
1236 *ing*). We chose a control of fallow-soil microbiome-propagation because this treatment resembles the kind  
1237 of microbiome conditions that many plants encounter in horticulture and agriculture (soils are left fallow  
1238 for some time before planting). Changes in fallow-soil microbiomes between Generations reflect ecological  
1239 changes as microbe communities change over time, as well as any microbial immigration from external  
1240 sources (e.g., airborne microbes raining into the soil; perhaps also unintended accidental cross-contamina-  
1241 tion between soils from different pots). We initially allocated 8 control-replicate test-plants per Fallow-  
1242 Soil-Line to test the effect of each harvested fallow-soil microbiomes on plant growth (total of  $5 \times 8 = 40$   
1243 replicates for SOD,  $5 \times 8 = 40$  replicates for ALU), but we reduced the number of control-replicate test-plants  
1244 for each of the 5 Fallow-Soil-Control replicates per line in later Generations (first reducing the number to  
1245 6 control-replicate test-plants per line in Generation 4; then reducing the number to 4 control-replicate test-  
1246 plants per line in Generation 5-9), because it became clear during the first few Generations that plants  
1247 receiving fallow-soil-microbiomes grew poorly under the salt stresses, far inferior to plants in the corre-  
1248 sponding selection-lines where plants received artificially selected microbiomes (i.e., we could differentiate  
1249 averages between fallow-soil and microbiome-selection lines even with the smaller number of control-  
1250 replicate test-plants in the fallow-soil controls). **Control 2, Null-Control:** For this control, plants received  
1251 no experimental microbial inoculation; instead, these control plants received on the day of microbiome  
1252 transfer an aliquot of the same sterile salt-nutrient buffer that we used to harvest microbiomes and then  
1253 transfer to seeds of the next Generation. Because our pots were capped for the first 4 days of seed germi-  
1254 nation, Null-Control-plants grow initially under sterile conditions (before caps are lifted on Day4), but air-  
1255 borne microbes can enter the sterile soil and rhizospheres of Null plants from the air after Day4 once caps  
1256 are lifted from pots. In pilot experiments, Null-Control plants invariably grew better during the first 10-20  
1257 days than any plant inoculated with microbiomes (see Table S1a-c), possibly because Null-Control plants  
1258 do not need to expend resources to mediate interactions with microbes, or because Null-Control plants do  
1259 not have to compete with microbes for nutrients in the soil. Despite the microbially unusual soils of Null-  
1260 Control plants, we included this control treatment because it was easy to set up (no microbiomes needed to  
1261 be harvested to inoculate Null-Control soils), because Null-Control conditions were easy to standardize  
1262 within Generations, and because Null-control Conditions may even be standardized between Generations  
1263 if microbial immigration (i.e., rain of airborne microbes) into Null-Control soils can be assumed to be rel-  
1264 atively constant over time. We initially allocated 10 replicates of SOD pots and 10 replicates of ALU pots  
1265 to Null-Controls, but we increased the number of replicates in later Generations for the Null-Control treat-  
1266 ments (first we increased to 20 replicates in Generation 4, then to 30 replicates in subsequent Generations)  
1267 in order to improve the estimates (reduce confidence intervals) of the average growth of plants in Null-  
1268 Control treatments. Sample sizes for all treatments are summarized for all Generations in Table S1a-c.

## Artificial Selection on Microbiomes to Confer Salt-Tolerance to Plants

Mueller et al, bioRxiv, Draft 8Nov2019; please email comments to: umueller@austin.utexas.edu

1269 **Watering During Each Selection Cycle:** We watered pots such that the total weight (pot plus hydrated  
1270 soil) stayed between 200-250g and did not exceed 260g. We found in pilot experiments that a pot would  
1271 be over-hydrated if the total weight reached 260-270g or more, which would result in dripping of excess  
1272 water from the bottom of the pot, thus leaching nutrients and salts. Keeping pot weights well below 260g  
1273 at all times therefore prevented leaching of nutrients and salt. To prevent cross-contamination (microbe-  
1274 exchange) between pots, we did not use bottom-hydration by immersing racks in a waterbath, but we wa-  
1275 tered pots individually, only from above, and always with autoclaved water that we dispensed with a Ser-  
1276 ipetter Dispenser (adjustable to dispense volumes of 2.5-25ml; BrandTech Scientific Inc; Essex, CT, USA)  
1277 mounted on a 6-liter carboy. Because we kept pots capped during the first 4 days of plant growth (we  
1278 removed caps during the afternoon of Day 4), soils remained well-hydrated during germination (little water  
1279 evaporated from soil, humidity inside the cap was near 100%). We watered for the first time on Day 5 of  
1280 each selection-cycle, and thereafter approximately every 2 days (sometimes also at 1-day or 3-day intervals,  
1281 depending on humidity in the growth chamber and on experimenter time-constraints), but we did not pre-  
1282 plan to follow a rigorous 2-day watering schedule (see Table S3). We typically watered 15-25 ml per pot  
1283 depending on water loss, which depended on humidity in the growth chamber and on the size of plants  
1284 (humidity was greatest during Generations 4&5 because of unusually high rainfall in spring 2015). To  
1285 determine the volume to be watered on a given day, we selected six pots haphazardly from the 4 racks, and  
1286 weighed these on a scale (sterilizing the surface of the scale with 100% ethanol before placing a pot onto  
1287 the scale). The difference between the average weight of these six pots and 255mg was the maximum quan-  
1288 tity of water to be added to each pot. The amount to be watered could be varied to the nearest 0.5 milliliter  
1289 with the carboy-mounted Seripetter Dispenser. To prepare carboys, we filled each with 6 liter of e-pure  
1290 water, and autoclaved the water to ensure sterile watering. Immediately before watering, we quickly opened  
1291 a carboy to add a specific volume of 1-Molar salt solution to generate a desired salt-concentration in the  
1292 water (details in Table S3), mixed the contents by vigorous shaking of the carboy, mounted the ethanol-  
1293 sterilized Seripetter Dispenser onto the carboy, flushed the dispenser five times to eliminate any ethanol in  
1294 the dispenser, then began the watering. During the days when the Seripetter Dispenser was not used, we  
1295 mounted it on a 1-Liter bottle with 100% ethanol, and kept the entire dispenser filled with ethanol to prevent  
1296 growth of microbial biofilms inside the dispenser. We used different carboys dedicated to watering of SOD-  
1297 salt and ALU-salt, to minimize cross-contamination of salts between treatments. In each round of watering,  
1298 we first watered all pots of the SOD-treatment, then rinsed the dispenser with 100% ethanol, then watering  
1299 all pots of the ALU-treatment. To minimize the chance of accidentally adding the wrong salt-water to a pot  
1300 (e.g., accidentally watering ALU-soil with SOD-water, or vice versa), we labeled pots of the different salt  
1301 treatments with different colors (white-label for pots ##001-100 to indicate SOD-treatment, and green-label  
1302 for pots ##101-200 to indicate ALU-treatment). Table S3 summarizes the exact watering schedules, vol-  
1303 umes of water added, and salt concentrations of the water added.

1304 **Flowering:** Because we short-cycled plants in Generations 0-8 and harvested microbiomes when plants  
1305 were relatively young (20-30 days old; the largest plants had typically 10-15 leaves), only few plants bolted  
1306 and developed flowers during the short-cycled Generations 0-8; all these cases of flowering were in Gen-  
1307 erations 1 & 8 (Table S1a&b), whereas no plants flowered in Generation 0 and in Generations 2-7. The  
1308 long light-phase (20h light, 4h dark) stimulated flowering uniformly in each Generation, but our short-  
1309 cycling scheme aimed to harvest microbiomes well before plants began to flower. Because of scheduling-  
1310 constraints, Generation 8 was grown for slightly longer (31 days) than earlier Generations, which could  
1311 explain the flowering in some of these plants, but it is unclear why some plants began to flower in the far  
1312 shorter Generation 1 (20 days). Plants in Generation 9 were grown for 68 days to permit seeds to ripen, and  
1313 most of these plants flowered (Table S1c). The fact that not all plants flowered in Generation 9, and the  
1314 observation that onset of flowering was delayed in the control-treatments (Table S1c), indicate that plants  
1315 were indeed stressed by the salts, because in salt-free soils virtually all plants would have flowered.  
1316

## Artificial Selection on Microbiomes to Confer Salt-Tolerance to Plants

Mueller et al, bioRxiv, Draft 8Nov2019; please email comments to: umueller@austin.utexas.edu

1317 **Table S3. Ramping Salt-Stress Between and Within Microbiome-Generations.** Soil in each pot was initially hy-  
 1318 drated with 102 ml salt-solution [94 ml added to soil prior to autoclaving; 4 ml during planting; and 4 ml during  
 1319 microbiome inoculation in Generations 1-9 (2 ml in Generation 0); see *Planting and Inoculation of Seeds*]. In the  
 1320 baseline Generation 0, plants were watered only with unsalted water, but starting with Generation 1, we increased  
 1321 salt-stress *within* each Generation by watering with salted water. Because we capped pots for the first 4 days to control  
 1322 initial microbiome assembly, we started watering each Generation on Days 5 or 6. Pots of Generations 0-3 were  
 1323 watered more because of low humidity (because of heating of Greenhouse Facility in winter) and pots of Generations  
 1324 4&5 were watered less because of high humidity (unusual rainfall in spring, increasing general humidity; see *Growth*  
 1325 *Chamber*). Pots were watered more in the second half of Generation 9 because plants grew large and transpired more  
 1326 water. Plants of Generations 0-8 were short-cycled to grow only for 20-30 days before microbiome transfer (to about  
 1327 10-15 leaves for the largest plants); plants in Generation 9 were grown for 68 days to permit ripening of seeds.  
 1328 SOD = sodium-sulfate; ALU = aluminum-sulfate.

|                                               |  | Microbiome-Generation (Selection-Cycle) |                     |                     |                     |                     |                     |                 |                  |                     |                     |                 |                  |                     |                     |                     |                     |                 |                  |                 |                  |
|-----------------------------------------------|--|-----------------------------------------|---------------------|---------------------|---------------------|---------------------|---------------------|-----------------|------------------|---------------------|---------------------|-----------------|------------------|---------------------|---------------------|---------------------|---------------------|-----------------|------------------|-----------------|------------------|
|                                               |  | Gen 0                                   |                     | Gen 1               |                     | Gen 2               |                     | Gen 3           |                  | Gen 4               |                     | Gen 5           |                  | Gen 6               |                     | Gen 7               |                     | Gen 8           |                  | Gen 9           |                  |
| Initial Soil Hydration<br>(see also Table S2) |  | SOD                                     | ALU                 | SOD                 | ALU                 | SOD                 | ALU                 | SOD             | ALU              | SOD                 | ALU                 | SOD             | ALU              | SOD                 | ALU                 | SOD                 | ALU                 | SOD             | ALU              | SOD             | ALU              |
|                                               |  | 100 ml<br>20 mM                         | 100 ml<br>0.02 mM   | 102 ml<br>30 mM     | 102 ml<br>0.04 mM   | 102 ml<br>50 mM     | 102 ml<br>0.08 mM   | 102 ml<br>60 mM | 102 ml<br>0.2 mM | 102 ml<br>70 mM     | 102 ml<br>1.0 mM    | 102 ml<br>75 mM | 102 ml<br>3.0 mM | 102 ml<br>60 mM     | 102 ml<br>1.0 mM    | 102 ml<br>60 mM     | 102 ml<br>1.0 mM    | 102 ml<br>60 mM | 102 ml<br>1.5 mM | 102 ml<br>60 mM | 102 ml<br>1.5 mM |
| Watering Schedule                             |  |                                         |                     |                     |                     |                     |                     |                 |                  |                     |                     |                 |                  |                     |                     |                     |                     |                 |                  |                 |                  |
| Day 5                                         |  | 15ml<br>0 mM                            | 15ml<br>0 mM        | 15ml<br>0 mM        | 15ml<br>0 mM        | 15ml<br>15 mM       | 15ml<br>0.16 mM     | 15ml<br>15 mM   | 15ml<br>0.20 mM  | 10ml<br>15 mM       | 10ml<br>3.0 mM      | -               | -                | -                   | -                   | 15ml<br>15 mM       | 15ml<br>2.0 mM      | 20ml<br>15 mM   | 20ml<br>2.0 mM   | 20ml<br>15 mM   | 20ml<br>2.0 mM   |
| Day 6                                         |  | 23ml<br>0 mM                            | 23ml<br>0 mM        | 20ml<br>0 mM        | 20ml<br>0 mM        | 25ml<br>15 mM       | 25ml<br>0.16 mM     | -               | -                | -                   | -                   | 5ml<br>15 mM    | 5ml<br>5.0 mM    | 15ml<br>15 mM       | 15ml<br>4.0 mM      | -                   | -                   | 15ml<br>15 mM   | 15ml<br>2.0 mM   | 25ml<br>15 mM   | 25ml<br>2.0 mM   |
| Day 7                                         |  | -                                       | -                   | -                   | -                   | -                   | -                   | 25ml<br>15 mM   | 25ml<br>0.60 mM  | 25ml<br>15 mM       | 25ml<br>3.0 mM      | -               | -                | -                   | -                   | 15ml<br>15 mM       | 15ml<br>2.0 mM      | 25ml<br>15 mM   | 25ml<br>2.0 mM   | -               | -                |
| Day 8                                         |  | 17ml<br>0 mM                            | 17ml<br>0 mM        | 20ml<br>15 mM       | 20ml<br>0.02 mM     | 25ml<br>15 mM       | 25ml<br>0.16 mM     | -               | -                | 25ml<br>15 mM       | 25ml<br>0.90 mM     | -               | -                | -                   | -                   | -                   | -                   | 20ml<br>15 mM   | 20ml<br>15 mM    | 20ml<br>15 mM   | 20ml<br>2.0 mM   |
| Day 9                                         |  | -                                       | -                   | -                   | -                   | -                   | -                   | 25ml<br>15 mM   | 25ml<br>0.90 mM  | -                   | -                   | 10ml<br>15 mM   | 10ml<br>10.0 mM  | 25ml<br>15 mM       | 25ml<br>4.0 mM      | 15ml<br>15 mM       | 15ml<br>2.0 mM      | 25ml<br>15 mM   | 25ml<br>2.0 mM   | -               | -                |
| Day 10                                        |  | 25ml<br>0 mM                            | 25ml<br>0 mM        | 20ml<br>0 mM        | 20ml<br>0 mM        | 25ml<br>15 mM       | 25ml<br>0.24 mM     | -               | -                | 25ml<br>15 mM       | 25ml<br>5.0 mM      | -               | -                | 15ml<br>15 mM       | 15ml<br>4.0 mM      | -                   | -                   | 15ml<br>15 mM   | 15ml<br>2.0 mM   | 15ml<br>15 mM   | 15ml<br>2.0 mM   |
| Day 11                                        |  | -                                       | -                   | -                   | -                   | -                   | -                   | 25ml<br>15 mM   | 25ml<br>0.90 mM  | 25ml<br>15 mM       | 25ml<br>5.0 mM      | -               | -                | 15ml<br>15 mM       | 15ml<br>4.0 mM      | -                   | -                   | 15ml<br>15 mM   | 15ml<br>2.0 mM   | -               | -                |
| Day 12                                        |  | 25ml<br>0 mM                            | 25ml<br>0 mM        | 25ml<br>15 mM       | 25ml<br>0.02 mM     | 25ml<br>15 mM       | 25ml<br>0.32 mM     | -               | -                | -                   | -                   | -               | -                | -                   | -                   | 15ml<br>15 mM       | 15ml<br>2.0 mM      | -               | -                | -               | -                |
| Day 13                                        |  | -                                       | -                   | -                   | -                   | 25ml<br>15 mM       | 25ml<br>0.32 mM     | 25ml<br>15 mM   | 25ml<br>1.20 mM  | 25ml<br>15 mM       | 25ml<br>1.20 mM     | 20ml<br>15 mM   | 20ml<br>15.0 mM  | 25ml<br>15 mM       | 25ml<br>5.0 mM      | -                   | -                   | 15ml<br>15 mM   | 15ml<br>2.0 mM   | 20ml<br>15 mM   | 20ml<br>2.0 mM   |
| Day 14                                        |  | 25ml<br>0 mM                            | 25ml<br>0 mM        | 25ml<br>15 mM       | 25ml<br>0.04 mM     | -                   | -                   | -               | -                | -                   | -                   | -               | -                | -                   | -                   | 20ml<br>15 mM       | 20ml<br>2.0 mM      | -               | -                | 15ml<br>15 mM   | 15ml<br>2.0 mM   |
| Day 15                                        |  | -                                       | -                   | -                   | -                   | 25ml<br>15 mM       | 25ml<br>0.40 mM     | 25ml<br>15 mM   | 25ml<br>1.50 mM  | 10ml<br>15 mM       | 10ml<br>5.0 mM      | -               | -                | -                   | -                   | -                   | -                   | 15ml<br>15 mM   | 15ml<br>2.0 mM   | -               | -                |
| Day 16                                        |  | 25ml<br>0 mM                            | 25ml<br>0 mM        | 25ml<br>15 mM       | 25ml<br>0.08 mM     | -                   | -                   | -               | -                | -                   | -                   | 20ml<br>15 mM   | 20ml<br>15.0 mM  | 15ml<br>15 mM       | 15ml<br>5.0 mM      | 20ml<br>15 mM       | 20ml<br>2.0 mM      | 15ml<br>15 mM   | 15ml<br>2.0 mM   | 18ml<br>15 mM   | 18ml<br>2.0 mM   |
| Day 17                                        |  | -                                       | -                   | -                   | -                   | 25ml<br>15 mM       | 25ml<br>0.60 mM     | -               | -                | -                   | -                   | 20ml<br>15 mM   | 20ml<br>15.0 mM  | 15ml<br>15 mM       | 15ml<br>5.0 mM      | 20ml<br>15 mM       | 20ml<br>2.0 mM      | 15ml<br>15 mM   | 15ml<br>2.0 mM   | 18ml<br>15 mM   | 18ml<br>2.0 mM   |
| Day 18                                        |  | 25ml<br>0 mM                            | 25ml<br>0 mM        | 25ml<br>15 mM       | 25ml<br>0.08 mM     | -                   | -                   | 25ml<br>15 mM   | 25ml<br>1.80 mM  | 15ml<br>15 mM       | 15ml<br>5.0 mM      | -               | -                | -                   | -                   | -                   | -                   | -               | -                | -               | -                |
| Day 19                                        |  | -                                       | -                   | -                   | -                   | 25ml<br>15 mM       | 25ml<br>0.90 mM     | -               | -                | -                   | -                   | -               | -                | -                   | -                   | 20ml<br>15 mM       | 20ml<br>2.0 mM      | -               | -                | -               | -                |
| Day 20                                        |  | 25ml<br>0 mM                            | 25ml<br>0 mM        | Transfer<br>to Gen2 | Transfer<br>to Gen2 | -                   | -                   | 25ml<br>15 mM   | 25ml<br>1.80 mM  | -                   | -                   | 25ml<br>15 mM   | 25ml<br>3.0 mM   | 25ml<br>15 mM       | 25ml<br>5.0 mM      | 20ml<br>15 mM       | 20ml<br>2.0 mM      | 20ml<br>15 mM   | 20ml<br>2.0 mM   | 18ml<br>15 mM   | 18ml<br>2.0 mM   |
| Day 21                                        |  | -                                       | -                   | -                   | -                   | Transfer<br>to Gen3 | Transfer<br>to Gen3 | -               | -                | 20ml<br>15 mM       | 20ml<br>5.0 mM      | 25ml<br>15 mM   | 25ml<br>15.0 mM  | -                   | -                   | 15ml<br>15 mM       | 15ml<br>2.0 mM      | -               | -                | -               | -                |
| Day 22                                        |  | Transfer<br>to Gen1                     | Transfer<br>to Gen1 | -                   | -                   | -                   | -                   | 10ml<br>15 mM   | 10ml<br>1.80 mM  | -                   | -                   | -               | -                | -                   | -                   | -                   | -                   | -               | -                | -               | -                |
| Day 23                                        |  | -                                       | -                   | -                   | -                   | Transfer<br>to Gen4 | Transfer<br>to Gen4 | -               | -                | -                   | -                   | -               | -                | -                   | -                   | 20ml<br>15 mM       | 20ml<br>2.0 mM      | 25ml<br>15 mM   | 25ml<br>2.0 mM   | 20ml<br>15 mM   | 20ml<br>2.0 mM   |
| Day 24                                        |  | -                                       | -                   | -                   | -                   | -                   | -                   | -               | -                | 10ml<br>15 mM       | 10ml<br>5.0 mM      | -               | -                | 20ml<br>15 mM       | 20ml<br>3.0 mM      | -                   | -                   | -               | -                | -               | -                |
| Day 25                                        |  | -                                       | -                   | -                   | -                   | -                   | -                   | -               | -                | Transfer<br>to Gen5 | Transfer<br>to Gen5 | 20ml<br>15 mM   | 20ml<br>15.0 mM  | -                   | -                   | 20ml<br>15 mM       | 20ml<br>2.0 mM      | 25ml<br>15 mM   | 25ml<br>2.0 mM   | -               | -                |
| Day 26                                        |  | -                                       | -                   | -                   | -                   | -                   | -                   | -               | -                | -                   | -                   | -               | -                | Transfer<br>to Gen7 | Transfer<br>to Gen7 | -                   | -                   | 25ml<br>15 mM   | 25ml<br>2.0 mM   | 18ml<br>15 mM   | 18ml<br>2.0 mM   |
| Day 27                                        |  | -                                       | -                   | -                   | -                   | -                   | -                   | -               | -                | -                   | -                   | -               | -                | -                   | -                   | 20ml<br>15 mM       | 20ml<br>2.0 mM      | -               | -                | -               | -                |
| Day 28                                        |  | -                                       | -                   | -                   | -                   | -                   | -                   | -               | -                | -                   | -                   | -               | -                | Transfer<br>to Gen8 | Transfer<br>to Gen8 | 20ml<br>15 mM       | 20ml<br>2.0 mM      | 20ml<br>15 mM   | 20ml<br>2.0 mM   | 20ml<br>15 mM   | 20ml<br>2.0 mM   |
| Day 29                                        |  | -                                       | -                   | -                   | -                   | -                   | -                   | -               | -                | -                   | -                   | 20ml<br>15 mM   | 20ml<br>15.0 mM  | -                   | -                   | -                   | -                   | -               | -                | -               | -                |
| Day 30                                        |  | -                                       | -                   | -                   | -                   | -                   | -                   | -               | -                | -                   | -                   | -               | -                | -                   | -                   | -                   | -                   | 10ml<br>15 mM   | 10ml<br>2.0 mM   | -               | -                |
| Day 31                                        |  | -                                       | -                   | -                   | -                   | -                   | -                   | -               | -                | 10ml<br>15 mM       | 10ml<br>15.0 mM     | -               | -                | -                   | -                   | Transfer<br>to Gen9 | Transfer<br>to Gen9 | 20ml<br>15 mM   | 20ml<br>2.0 mM   | 20ml<br>15 mM   | 20ml<br>2.0 mM   |
| Day 32                                        |  | -                                       | -                   | -                   | -                   | -                   | -                   | -               | -                | Transfer<br>to Gen6 | Transfer<br>to Gen6 | -               | -                | -                   | -                   | -                   | -                   | 20ml<br>15 mM   | 20ml<br>2.0 mM   | 20ml<br>15 mM   | 20ml<br>2.0 mM   |
| Day 33                                        |  | -                                       | -                   | -                   | -                   | -                   | -                   | -               | -                | -                   | -                   | -               | -                | -                   | -                   | -                   | -                   | -               | -                | -               | -                |
| Day 34                                        |  | -                                       | -                   | -                   | -                   | -                   | -                   | -               | -                | -                   | -                   | -               | -                | -                   | -                   | -                   | -                   | -               | -                | 20ml<br>15 mM   | 20ml<br>2.0 mM   |
| Day 35                                        |  | -                                       | -                   | -                   | -                   | -                   | -                   | -               | -                | -                   | -                   | -               | -                | -                   | -                   | -                   | -                   | -               | -                | -               | -                |
| Day 36                                        |  | -                                       | -                   | -                   | -                   | -                   | -                   | -               | -                | -                   | -                   | -               | -                | -                   | -                   | -                   | -                   | -               | -                | 20ml<br>15 mM   | 20ml<br>2.0 mM   |
| Day 37                                        |  | -                                       | -                   | -                   | -                   | -                   | -                   | -               | -                | -                   | -                   | -               | -                | -                   | -                   | -                   | -                   | -               | -                | -               | -                |
| Day 38                                        |  | -                                       | -                   | -                   | -                   | -                   | -                   | -               | -                | -                   | -                   | -               | -                | -                   | -                   | -                   | -                   | -               | -                | 20ml<br>15 mM   | 20ml<br>2.0 mM   |
| Day 39                                        |  | -                                       | -                   | -                   | -                   | -                   | -                   | -               | -                | -                   | -                   | -               | -                | -                   | -                   | -                   | -                   | -               | -                | 20ml<br>15 mM   | 20ml<br>2.0 mM   |
| Day 40                                        |  | -                                       | -                   | -                   | -                   | -                   | -                   | -               | -                | -                   | -                   | -               | -                | -                   | -                   | -                   | -                   | -               | -                | -               | -                |
| Day 41                                        |  | -                                       | -                   | -                   | -                   | -                   | -                   | -               | -                | -                   | -                   | -               | -                | -                   | -                   | -                   | -                   | -               | -                | 20ml<br>15 mM   | 20ml<br>2.0 mM   |
| Day 42                                        |  | -                                       | -                   | -                   | -                   | -                   | -                   | -               | -                | -                   | -                   | -               | -                | -                   | -                   | -                   | -                   | -               | -                | -               | -                |
| Day 43                                        |  | -                                       | -                   | -                   | -                   | -                   | -                   | -               | -                | -                   | -                   | -               | -                | -                   | -                   | -                   | -                   | -               | -                | 20ml<br>15 mM   | 20ml<br>2.0 mM   |
| Day 44                                        |  | -                                       | -                   | -                   | -                   | -                   | -                   | -               | -                | -                   | -                   | -               | -                | -                   | -                   | -                   | -                   | -               | -                | -               | -                |
| Day 45                                        |  | -                                       | -                   | -                   | -                   | -                   | -                   | -               | -                | -                   | -                   | -               | -                | -                   | -                   | -                   | -                   | -               | -                | -               | -                |
| Day 46                                        |  | -                                       | -                   | -                   | -                   | -                   | -                   | -               | -                | -                   | -                   | -               | -                | -                   | -                   | -                   | -                   | -               | -                | 20ml<br>15 mM   | 20ml<br>2.0 mM   |
| Day 47                                        |  | -                                       | -                   | -                   | -                   | -                   | -                   | -               | -                | -                   | -                   | -               | -                | -                   | -                   | -                   | -                   | -               | -                | 20ml<br>15 mM   | 20ml<br>2.0 mM   |

## Artificial Selection on Microbiomes to Confer Salt-Tolerance to Plants

Mueller et al, bioRxiv, Draft 8Nov2019; please email comments to: umueller@austin.utexas.edu

|        |  |  |  |  |  |  |  |  |  |  |  |  |  |  |  |  |  |  |  |               |                |
|--------|--|--|--|--|--|--|--|--|--|--|--|--|--|--|--|--|--|--|--|---------------|----------------|
| Day 48 |  |  |  |  |  |  |  |  |  |  |  |  |  |  |  |  |  |  |  | 20ml<br>15 mM | 20ml<br>2.0 mM |
| Day 49 |  |  |  |  |  |  |  |  |  |  |  |  |  |  |  |  |  |  |  | -             | -              |
| Day 50 |  |  |  |  |  |  |  |  |  |  |  |  |  |  |  |  |  |  |  | 20ml<br>15 mM | 20ml<br>2.0 mM |
| Day 51 |  |  |  |  |  |  |  |  |  |  |  |  |  |  |  |  |  |  |  | -             | -              |
| Day 52 |  |  |  |  |  |  |  |  |  |  |  |  |  |  |  |  |  |  |  | 20ml<br>15 mM | 20ml<br>2.0 mM |
| Day 53 |  |  |  |  |  |  |  |  |  |  |  |  |  |  |  |  |  |  |  | -             | -              |
| Day 54 |  |  |  |  |  |  |  |  |  |  |  |  |  |  |  |  |  |  |  | -             | -              |
| Day 55 |  |  |  |  |  |  |  |  |  |  |  |  |  |  |  |  |  |  |  | 20ml<br>15 mM | 20ml<br>2.0 mM |
| Day 56 |  |  |  |  |  |  |  |  |  |  |  |  |  |  |  |  |  |  |  | 20ml<br>15 mM | 20ml<br>2.0 mM |
| Day 57 |  |  |  |  |  |  |  |  |  |  |  |  |  |  |  |  |  |  |  | 20ml<br>15 mM | 20ml<br>2.0 mM |
| Day 58 |  |  |  |  |  |  |  |  |  |  |  |  |  |  |  |  |  |  |  | 20ml<br>15 mM | 20ml<br>2.0 mM |
| Day 59 |  |  |  |  |  |  |  |  |  |  |  |  |  |  |  |  |  |  |  | 20ml<br>15 mM | 20ml<br>2.0 mM |
| Day 60 |  |  |  |  |  |  |  |  |  |  |  |  |  |  |  |  |  |  |  | -             | -              |
| Day 61 |  |  |  |  |  |  |  |  |  |  |  |  |  |  |  |  |  |  |  | 20ml<br>15 mM | 20ml<br>2.0 mM |
| Day 62 |  |  |  |  |  |  |  |  |  |  |  |  |  |  |  |  |  |  |  | -             | -              |
| Day 63 |  |  |  |  |  |  |  |  |  |  |  |  |  |  |  |  |  |  |  | 20ml<br>15 mM | 20ml<br>2.0 mM |
| Day 64 |  |  |  |  |  |  |  |  |  |  |  |  |  |  |  |  |  |  |  | -             | -              |
| Day 65 |  |  |  |  |  |  |  |  |  |  |  |  |  |  |  |  |  |  |  | 20ml<br>15 mM | 20ml<br>2.0 mM |
| Day 66 |  |  |  |  |  |  |  |  |  |  |  |  |  |  |  |  |  |  |  | -             | -              |
| Day 67 |  |  |  |  |  |  |  |  |  |  |  |  |  |  |  |  |  |  |  | 20ml<br>15 mM | 20ml<br>2.0 mM |
| Day 68 |  |  |  |  |  |  |  |  |  |  |  |  |  |  |  |  |  |  |  | 15ml<br>15 mM | 15ml<br>2.0 mM |
| Day 69 |  |  |  |  |  |  |  |  |  |  |  |  |  |  |  |  |  |  |  | 15ml<br>15 mM | 15ml<br>2.0 mM |
| Day 70 |  |  |  |  |  |  |  |  |  |  |  |  |  |  |  |  |  |  |  | End           | End            |

1329  
1330

1331 **Analysis of Relative Plant Performance:** Because successive generations were not grown under precisely  
1332 identical conditions (e.g., we had to increase the duration of selection-cycles in later generations because  
1333 plant-growth decelerated slightly under the increasing salt-stress; we had to adjust watering schedules be-  
1334 cause of uncontrolled humidity in our growth chamber), we plot in Figure 1 plant-performance as relative  
1335 above-ground biomass (rather than absolute biomass), relativizing the observed dry-biomass of a specific  
1336 plant by average biomass across all plants in that plant's salt treatment (i.e., biomass of a SOD-plant is  
1337 relativized with respect to average biomass across all SOD-plants; likewise for ALU-plants). The overall  
1338 average across all plants within a salt-treatment in a given Generation is therefore 1, and plants (and selec-  
1339 tion lines) performing poorer than the average have scores <1, whereas plants or lines performing above  
1340 the average have scores >1 (see Figure 1). To calculate relative plant performance, we used the dry-biomass  
1341 grown by a plant during its selection-cycle, as summarized in Figure 1 and in Tables S1a-c. Records of  
1342 absolute above-ground dry-biomass for all plants of all Generations are also given in Tables S1a-c. In Gen-  
1343 eration 9, we allowed plants to grow for 68 days to permit ripening of seeds; plant performance and meta-  
1344 genomic information of plants in Generation 9 are therefore not comparable to previous Generations, but  
1345 treatments within Generation 9 can be compared.

1346 **Crossing Evolved SOD- and ALU-Microbiomes with SOD- and ALU-Stress in Generation 9; Solute-**  
1347 **Control in Generation 9:** At the end of the experiment in Microbiome Generation 9, we modified protocols  
1348 in three important ways: (a) we grew plants for 68 days to permit flowering and ripening of seeds, because  
1349 seed production seemed a more informative estimator of plant fitness than the proxy of above-ground bio-  
1350 mass used in earlier Generations; and (b) we doubled the total number of pots to 400 (i.e., 400 plants) to  
1351 permit addition of two control treatments (in addition to Fallow-Soil and Null-Control treatments already  
1352 used in earlier Generations). We added these two control treatments to understand the mechanistic basis of  
1353 the salt-tolerance-conferring effects of microbiomes in the SOD and ALU selection lines. The first addi-  
1354 tional control was *Solute Control*, where we filtered out all live cells from the harvested microbiomes in  
1355 the selection lines (using a 0.2µm filter; see above *Microbiome-Fractionation with Microfilters*), to test the  
1356 growth-enhancing effect of plant-secreted solutes and viruses that may be co-harvested and co-transferred  
1357 with microbiomes in the selection-lines. The second control was *2x2 Cross-Fostering Control* where we  
1358 crossed harvested microbiomes from the SOD and ALU selection lines with the two types of salt stress in  
1359 soil (i.e., microbiomes harvested from SOD-selection-lines were tested in both SOD-soil and in ALU-soil;  
1360 microbiomes harvested from ALU-selection-lines were tested in both SOD-soil and in ALU-soil) to test

## Artificial Selection on Microbiomes to Confer Salt-Tolerance to Plants

Mueller et al, bioRxiv, Draft 8Nov2019; please email comments to: umueller@austin.utexas.edu

1361 specificity of the salt-tolerance-conferring effects of the microbiomes. This Cross-Fostering treatment al-  
1362 lowed us to address the question whether the salt-tolerance-conferring effects of the *SOD-selected* micro-  
1363 biomes confer these effects only under SOD-stress, or also in ALU-stress; and vice versa the additional  
1364 question whether the salt-tolerance-conferring effects of the *ALU-selected* microbiomes confer these effects  
1365 only under SOD-stress, or also in ALU-stress. This basic cross-fostering design was inspired by the exper-  
1366 imental methods developed by Lau & Lennon (2012), except that, in contrast to Lau & Lennon (2012), our  
1367 plant-populations did not evolve, and that we artificially selected on microbiomes (whereas in Lau & Len-  
1368 non plant populations evolved under artificial selection and microbiomes were allowed to change ecologi-  
1369 cally, without artificial microbiome selection).

1370 **Phenotyping of Plants and Microbiome-Harvesting in the Last Generation 9:** In contrast to Genera-  
1371 tions 0-8 when we used early growth of plants (above-ground biomass during first 3-4 weeks) as host-  
1372 phenotype to select indirectly on microbiomes, in the last Generation 9, we allowed plants to mature for 68  
1373 days (10 weeks), such that plants could flower and seeds could ripen. Because of the longer growth, some  
1374 plants started to senesce towards the end of Generation 9 and some individual flower-stalks of some plants  
1375 started to dry (no plant dried completely by the end of Generation 9); comparisons of metagenomic infor-  
1376 mation from Generation 9 versus earlier Generations therefore need to be interpreted with caution (i.e.,  
1377 metagenomic information from Generation 9 is best compared between treatments within that Generation).  
1378 Despite these limits of metagenomic comparisons pertaining to Generation 9, we decided to grow plants to  
1379 seed in this last Generation because we were interested in understanding how treatment differences in  
1380 above-ground biomass apparent at Days 20-30 (when we harvested microbiomes in Generations 0-8) would  
1381 translate into treatment differences in flowering and seed-set if plants were allowed to grow longer. Apart  
1382 from the longer duration of Generation 9 to permit flowering, a second important difference is likely the  
1383 gradually increasing salt-concentration in soils of Generation 9 that were watered 34 times with salted water  
1384 over 68 days (Table S3), in contrast to watering with salted water fewer times over the shorter 20-30 days  
1385 in Generations 0-8 (9-12 waterings, depending on the Generation; see Table S3). At the end of Generation  
1386 9, all plants were cut at soil level, above-ground biomass was preserved for each plant in individual enve-  
1387 lopes (for drying and later weighing of seeds and overall biomass; see above), and each root systems was  
1388 extracted from its pot and placed into an autoclaved aluminum-tub for further processing. Harvested root-  
1389 systems of plants from Generations 0-8 were comparatively small (filling about 30-60% of the soil-volume  
1390 in each pot), but root-systems at the end of Generation 9 were large and extended through the entire soil-  
1391 volume in each pot. We shook-off most of the adhering soil from each root system of Generation 9, cut off  
1392 and discarded the top-most 2cm portion with sterile scissors, then cut the remaining root-system lengthwise  
1393 (top to bottom) to preserve half of the root-system in 100% ethanol (for metagenomic screens of bacterial  
1394 communities), whereas we flash-froze (in liquid nitrogen) the other half of the root-system for possible later  
1395 transcriptomics analyses. For some of the best-growing plants in the SOD- and ALU-selection-lines, we  
1396 also preserved a representative portion of the root-system in sterile 20% glycerol (for storage at -80°C for  
1397 possible later isolation of microbes). Processing all root-systems (nearly 400 plants) took considerable time  
1398 over three successive days (Days 68-70 of Generation 9). Although we processed plants from 3 racks on  
1399 Day 68 (Racks #3, #8, #7), 3 racks on Day 69 (Racks #6, #2, #4), and 2 racks on Day 70 (Racks #1, #5),  
1400 we summarize all weight-data of these plants in Table S1c in columns labeled Day 68.

1401 **Statistical Analyses: Plant Biomass, Generations 1-8:** We performed all analyses in R v3.3.1. We as-  
1402 sessed differences in above-ground plant biomass (dry weight) among treatments of Generations 1-8 by  
1403 fitting the data to a generalized linear mixed model with a gamma error distribution. Line was entered as a  
1404 random effect; generation, treatment, and their interaction were entered as fixed effects. Statistical signifi-  
1405 cance of fixed effects in the GLMMs were assessed with likelihood ratio tests and Tukey tests employed  
1406 for post-hoc comparisons of treatment means. Selection of the appropriate error distribution for the  
1407 GLMMs was evaluated by visual inspection of Q-Q plots, and homoscedasticity was assessed using plots  
1408 of the residuals of the model against the fitted values. Because plants were short-cycled in Generations 1-8  
1409 (i.e., grown long enough so plants produce typically 9-15 leaves, too short to bolt and produce flowers; see

## Artificial Selection on Microbiomes to Confer Salt-Tolerance to Plants

Mueller et al, bioRxiv, Draft 8Nov2019; please email comments to: umueller@austin.utexas.edu

1410 Table S2), plants did not produce any seeds, and therefore only above-ground plant biomass (dry weight)  
1411 could be compared between treatments of Generations 1-8.

1412 **Statistical Analyses: Total Seed Weight, Generation 9:** Because plants were grown long enough to flower  
1413 in Generation 9, we compared total seed weight per plant among microbiome-selection treatments (plant  
1414 present; microbiomes are harvested from plants for transfer to seeds), Fallow-Soil Control (no plant present;  
1415 microbiomes are harvested from fallow soil for transfer to seeds), and Null-Control (no initial microbiome  
1416 inoculation, microbes establish in microbiomes when microbes "rain in" from the air). Because plants were  
1417 strongly salt-stressed in Generation 9 and many plants therefore did not flower or only produced very few  
1418 seeds, the distribution of data was not normal (Figure S5 top-left). We therefore attempted several data-  
1419 transformations to approximate normality, including  $square-root(seed\ weight)$  transformation (Figure S5  
1420 top-right),  $log(seed\ weight)$  transformation [excluding the plants that generated zero seeds because  $log(0)$   
1421 is undefined; Figure S5 bottom-left], and  $log(seed\ weight + 1)$  transformation (making it possible to retain  
1422 the plants that produced zero seeds, because seed-weight values of all plants was increased by 1mg; Figure  
1423 S5 bottom-right). None of these transformations generated a distribution that approximated normality (Fig-  
1424 ures S5b-d). We therefore used Kruskal-Wallis tests for non-parametric evaluation of treatment differences;  
1425 and we used Mann-Whitney U-tests for non-parametric post-hoc comparisons between treatment means,  
1426 correcting p-values using the false discovery rate. All tests were two-tailed with  $\alpha=0.05$ .

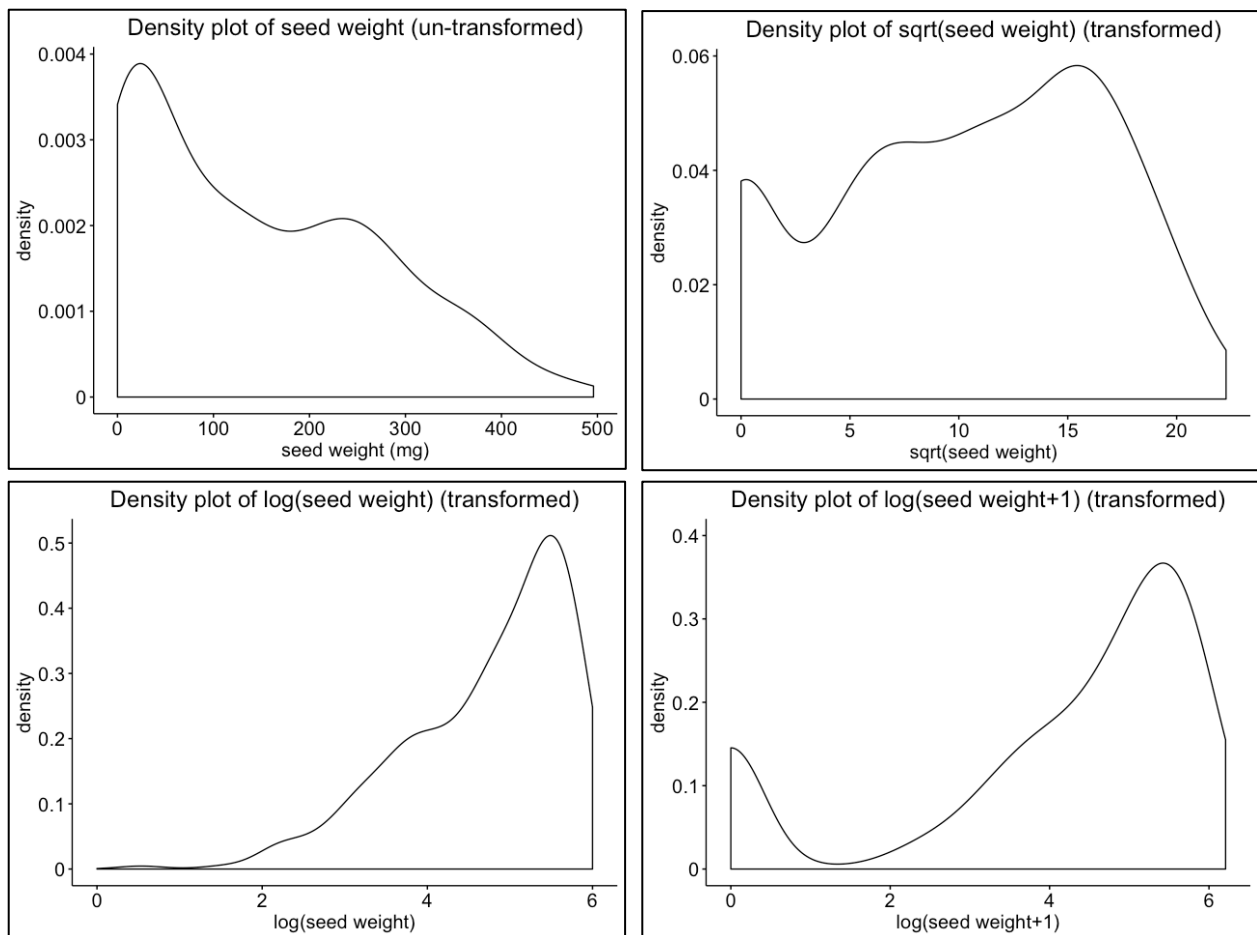

**Figure S5. Top-left:** untransformed seed-weight data in milligram (mg), indicating a skewed distribution, with many plants producing no or few seeds because of the extreme salt stress during Generation 9. **Top-right:** square-root transformed seed-weight data. **Bottom-left:** log-transformed seed-weight data, excluding seed-weights of zero because  $log(0)$  is not defined. **Bottom-right:** log-transformed seed-weight+1 data. None of the three transformations generated a distribution that approximated normality, and we therefore used non-parametric tests to evaluate differences in seed production between treatments.



## Artificial Selection on Microbiomes to Confer Salt-Tolerance to Plants

Mueller et al, bioRxiv, Draft 8Nov2019; please email comments to: umueller@austin.utexas.edu

### 1427 RESULTS

#### 1428 **Generations 1-8: Effects of differential microbiome propagation under sodium-sulfate (SOD) stress:**

1429 We found a significant main effect of treatment on plant biomass over 8 generations of microbiome selec-  
1430 tion under sodium-sulfate stress (LRT: Treatment, Chisq=27.8,  $p<0.001$ ; Generation, Chisq=381.8,  
1431  $p<0.001$ ; Treatment x Generation, Chisq=15.2,  $p=0.37$ ; Figure 2 left). Plant biomass was 75% higher in the  
1432 plant-present microbiome-selection lines ( $\beta=0.57 \pm 0.06$ ,  $z=10.0$ ,  $p<0.001$ ) than in the fallow-soil control  
1433 lines, and 66% higher than in the null-control line ( $\beta=0.50 \pm 0.07$ ,  $z=7.4$ ,  $p<0.001$ ). There was no sig-  
1434 nificant difference in biomass between the fallow-soil and the null-control treatments ( $\beta=0.07 \pm 0.06$ ,  
1435  $z=1.1$ ,  $p=0.29$ ). The lack of a significant interaction between treatment and generation (Chisq=15.2,  $p=0.37$ )  
1436 indicates that gains in plant biomass were realized quickly in the first few selection cycles, and that the  
1437 advantage of the plant-present treatment over the fallow-soil treatment was maintained as the concentration  
1438 of sodium-sulfate was ramped up over the course of the experiment.

1439 **Generation 9, SOD-treatments:** We measured total seed weight in the final Generation 9 of the experi-  
1440 ment and found significant difference among treatments (Kruskal-Wallis Chisq=10.6,  $p=0.01$ ; Figure 2  
1441 right). Total seed weight in the plant-present microbiome selection lines were 168% greater compared to  
1442 the null-control line, 120% greater than the fallow-soil control lines, and 205% greater than plants grown  
1443 in soil that was inoculated with filtrate (0.2 $\mu$ m filter) from the soil of plant-present microbiome-selection  
1444 lines (Figure 2 right; Table S3).

1445 **Table S3.** Mann-Whitney pairwise comparisons of total seed weight in the sodium-sulfate (SOD) treat-  
1446 ments. Values represent the test statistics (p-value in parentheses) for each comparison. Significant com-  
1447 parisons are indicated in bold. Np = Fallow soil microbiome-propagation control, Null=Null control line,  
1448 Pp=Plant-present microbiome-selection line, PpFilt=Plant-present microbiome-selection line filtrate.

|        | Np              | Null             | Pp               |
|--------|-----------------|------------------|------------------|
| Null   | 100 (0.50)      |                  |                  |
| Pp     | <b>0 (0.02)</b> | <b>20 (0.02)</b> |                  |
| PpFilt | 20 (0.50)       | 90 (0.71)        | <b>20 (0.02)</b> |

1449

#### 1450 **Generations 1-8: Effects of microbiome propagation under aluminum-sulfate (ALU) stress:**

1451 Unlike the sodium-sulfate experiment, we found a significant interaction between treatment and generation under  
1452 aluminum-sulfate stress (LRT: Treatment, Chisq=25.7,  $p<0.001$ ; Generation, Chisq=753.7,  $p<0.001$ ; Treat-  
1453 ment x Generation, Chisq=26.6,  $p=0.02$ ). The interaction was due to a drop in plant biomass in the fallow-  
1454 soil treatment in Generations 4 and 5 (Figure 2). To calculate a conservative estimate of the effect size of  
1455 our treatments on plant biomass, we re-ran the analysis excluding Generations 4 and 5, which eliminated  
1456 the significant interaction between treatment and generation (LRT: Treatment, Chisq=17.8,  $p<0.001$ ; Gen-  
1457 eration, Chisq=614.5,  $p<0.001$ , Treatment x Generation, Chisq=7.67,  $p=0.66$ ). In the reduced dataset, we  
1458 found that plant biomass in plant-present microbiome selection lines were 38% larger than in fallow-soil  
1459 lines ( $\beta=0.32 \pm 0.04$ ,  $z=8.9$ ,  $p<0.001$ ), but not significantly different from the null-control line ( $\beta=0.09$   
1460  $\pm 0.4$ ,  $z=2.3$ ,  $p=0.06$ ). Null-control plants generated 26% greater biomass than fallow-soil plants ( $\beta=0.23$   
1461  $\pm 0.04$ ,  $z=5.1$ ,  $p<0.001$ ).

1462 **Generation 9, ALU-treatments:** As in the sodium sulfate experiment, total seed weight in the final Gen-  
1463 eration 9 was significantly different among treatments (Kruskal-Wallis: Chisq=9,  $p=0.02$ ; Figure 2 right).  
1464 Total seeds weight in the plant-present microbiome selection lines were 194% greater than in the fallow-  
1465 soil lines, 101% greater than in the null-control line, and 55.4% greater than in the filtrate lines (Table S4).  
1466 Plants with filtrate-inoculated soil produced total seed weights that were 89.2% greater than plants grown  
1467 in the fallow-soil control (Figure 2 right; Table S4).

## Artificial Selection on Microbiomes to Confer Salt-Tolerance to Plants

Mueller et al, bioRxiv, Draft 8Nov2019; please email comments to: umueller@austin.utexas.edu

1468 **Table S4.** Mann-Whitney pairwise comparisons of total seed weight in the aluminum-sulfate (ALU) treat-  
1469 ments. Values represent the test statistics (p-value in parentheses) for each comparison. Significant com-  
1470 parisons are indicated in bold. Np = Fallow soil microbiome-propagation control, Null=Null control line,  
1471 Pp=Plant-present microbiome-selection line, PpFilt=Plant-present microbiome-selection line filtrate.

|        | Np              | Null             | Pp               |
|--------|-----------------|------------------|------------------|
| Null   | 80 (0.55)       |                  |                  |
| Pp     | <b>0 (0.02)</b> | <b>30 (0.03)</b> |                  |
| PpFilt | <b>0 (0.02)</b> | 70 (0.29)        | <b>20 (0.05)</b> |

1472

1473 **Interactions between selection history and salt stress on plant fitness:** By growing plants with microbi-  
1474 omes from selection lines under both sodium- and aluminum-sulfate stress (*Cross-Fostering Control*), we  
1475 examined whether microbiome selection produced microbiomes that conferred a salt-specific effect on  
1476 plants (e.g., whether microbiomes selected to confer tolerance to SOD conferred such tolerance only under  
1477 SOD stress but not to ALU stress), or alternatively whether selected microbiomes produced a generalized  
1478 improvement in plant fitness for both SOD and ALU stress. There was a significant interaction between  
1479 selection history and the type of salt stress to which plants were exposed in the last generation on seed mass  
1480 (Analysis of deviance: Selection history,  $F_{1,8} < 0.01$ ,  $p = 0.99$ ; Salt exposure,  $F_{1,141} = 5.82$ ,  $p = 0.017$ ; Selection  
1481 history x Salt exposure,  $F_{1,141} = 6.42$ ,  $p = 0.012$ ; Figure 2 right), indicating that performance under SOD-stress  
1482 or ALU-stress in Generation 9 depended upon which salt the microbiome was selected on during Genera-  
1483 tions 0-8.

1484 We conducted post-hoc comparisons of the treatment means and found that plants grown with microbiomes  
1485 selected in sodium sulfate had total seed weights that were 70.1% greater when exposed to sodium-sulfate  
1486 stress compared to exposure of aluminum-sulfate stress in Generation 9 ( $\beta = 108 \pm 31.0$ ,  $z = 3.5$ ,  $p = 0.002$ ).  
1487 In contrast, plants grown in microbiomes selected in aluminum-sulfate did not differ in similar total seed  
1488 weight, regardless of whether they were exposed to sodium- or aluminum-sulfate in Generation 9 ( $\beta = 4.2$   
1489  $\pm 31.8$ ,  $z = 0.13$ ,  $p = 0.99$ ). The effect of exposure to different kinds of salt stress on plant fitness thus depends  
1490 upon the selection history of the soil microbiome.

1491 Unlike total seed weight, there was no interaction between selection history and the type of salt stress on  
1492 total plant biomass, however there was a trend toward plants growing larger under ALU-stress compared  
1493 to SOD-stress irrespective of the selection history (Analysis of deviance: Selection history,  $F = 0.14$ ,  $p = 0.72$ ;  
1494 Salt exposure,  $F = 3.71$ ,  $p = 0.056$ ; Selection history x Salt exposure,  $F = 1.38$ ,  $p = 0.24$ ).

1495

1496

### 1497 References

1498 Aggarwal A, Ezaki B, Munjal A, Tripathi BN. 2015. Physiology and biochemistry of aluminum toxicity  
1499 and tolerance in crops. Pp 35-57 in *Stress Responses in Plants* (Tripathi BN & Müller M, eds), Springer  
1500 International Publishing.

1501 Bais HP, Weir TL, Perry LG, Gilroy S, Vivanco JM. 2006. The role of root exudates in rhizosphere inter-  
1502 actions with plants and other organisms. *Annu Rev Plant Biol* 57: 233-66.  
1503 DOI: 10.1146/annurev.arplant.57.032905.105159

1504 Bakken LR, Olsen RA. 1987. The relationship between cell size and viability of soil bacteria. *Microb Ecol*  
1505 13: 103-114. DOI: 10.1007/BF02011247

1506 Brkljacic J, Grotewold E, Scholl R, Mockler T, Garvin DF, Vain P, Brutnell T, Sibout R, Bevan M, Budak  
1507 H, Caicedo A, Gao C, Gu Y, Hazen S, Holt BF, Hong S, Jordan M, Manzaneda AJ, Mitchell-Olds T,

## Artificial Selection on Microbiomes to Confer Salt-Tolerance to Plants

Mueller et al, bioRxiv, Draft 8Nov2019; please email comments to: umueller@austin.utexas.edu

- 1508 Mochida K, Mur LAJ, Park C-M, Sedbrook J, Watt M, Zheng S, Vogel JP. 2011. *Brachypodium* as a  
1509 model for the grasses: today and the future. *Plant Physiol* 157: 3–13. DOI: 10.1104/pp.111.179531
- 1510 Bulgarelli D, Schlaeppli K, Spaepen S, van Themaat EVL, Schulze-Lefert P. 2013. Structure and functions  
1511 of the bacterial microbiota of plants. *Annu Rev Plant Biol* 64: 807–838. DOI: 10.1146/annurev-arplant-  
1512 050312-120106
- 1513 Coyte KZ, Schluter J, Foster KR. 2015. The ecology of the microbiome: Networks, competition, and sta-  
1514 bility. *Science* 350: 663–666. DOI: 10.1126/science.aad2602
- 1515 Delhaize E, Ryan PR. 1995. Aluminum toxicity and tolerance in plants. *Plant Physiology* 107: 315–321.  
1516 DOI: 10.1104/pp.107.2.315
- 1517 Des Marais DL, Juenger TE. 2011. *Brachypodium* and the abiotic environment. Pages 291-311 in *Genet-  
1518 ics and Genomics of Brachypodium* (Vogel JP, ed). Springer International Publishing.  
1519 DOI: 10.1007/7397\_2015\_13
- 1520 Des Marais DL, Razzaque S, Hernandez KM, Garvin DF, Juenger TE. 2016. Quantitative trait loci asso-  
1521 ciated with natural diversity in water-use efficiency and response to soil drying in *Brachypodium dis-  
1522 tachyon*. *Plant Science* 251: 2–11. DOI: 10.1016/j.plantsci.2016.03.010
- 1523 Dodd IC1, Pérez-Alfocea F. 2012. Microbial amelioration of crop salinity stress. *J Exp Bot* 63: 3415–3428.  
1524 DOI: 10.1093/jxb/ers033.
- 1525 Fierer N, Ferrenberg S, Flores GE, González A, Kueneman J, Legg T, Lynch RC, McDonald D, Mihaljevic  
1526 JR, O'Neill SP, Rhodes ME, Song SJ, Walters WA. 2012. From animalcules to an ecosystem: Applica-  
1527 tion of ecological concepts to the human microbiome. *Annu Rev Ecol Evol Syst* 43: 137–155. DOI:  
1528 10.1146/annurev-ecolsys-110411-160307
- 1529 Garland T, Rose MR. 2009. *Experimental Evolution*. University of California Press.
- 1530 Garvin DF, Gu YQ, Hasterok R, Hazen SP, Jenkins G, Mockler TC, Mur LAJ, Vogel JP. 2008. Develop-  
1531 ment of genetic and genomic research resources for *Brachypodium distachyon*, a new model system for  
1532 grass crop research. *Crop Science* 48: S69–S84. DOI: 10.2135/cropsci2007.06.0332tpg
- 1533 ISO/FDIS 10390 (2005) Soil quality – Determination of pH. International Organization for Standardization,  
1534 2005. [www.iso.org/iso/catalogue\\_detail.htm?csnumber=40879](http://www.iso.org/iso/catalogue_detail.htm?csnumber=40879)  
1535 [www.ecn.nl/docs/society/horizontal/pH\\_standard\\_for\\_validation.pdf](http://www.ecn.nl/docs/society/horizontal/pH_standard_for_validation.pdf)
- 1536 Lau JA, Lennon JT. 2012. Rapid responses of soil microorganisms improve plant fitness in novel environ-  
1537 ments. *Proc Natl Acad Sci USA* 109: 14058–14062. DOI: 10.1073/pnas.1202319109
- 1538 Lodeyro AF, Carrillo N. 2015. Salt stress in higher plants: mechanisms of toxicity and defensive responses.  
1539 Pp 1-33 in *Stress Responses in Plants* (Tripathi BN & Müller M, eds), Springer International Publishing.
- 1540 Luef B, Frischkorn KR, Wrighton KC, Holman HY, Birarda G, Thomas BC, Singh A, Williams KH,  
1541 Siegerist CE, Tringe SG, Downing KH, Comolli LR, Banfield JF. 2015. Diverse uncultivated ultra-small  
1542 bacterial cells in groundwater. *Nat Commun* 6: 6372. DOI: 10.1038/ncomms7372
- 1543 Mueller, U.G. Gerardo NM, Aanen DK, Six DL, Schultz TR. 2005. The evolution of agriculture in insects.  
1544 *Annu Rev Ecol Evol Syst* 36: 563–595. DOI: 10.1146/annurev.ecolsys.36.102003.152626
- 1545 Mueller UG, Sachs JL. 2015. Engineering microbiomes to improve plant and animal health. *Trends Micro-  
1546 biol* 23: 606–617. DOI: 10.1016/j.tim.2015.07.009
- 1547 Panke-Buisse K, Poole AC, Goodrich JK, Ley RE, Kao-Kniffin J. 2015. Selection on soil microbiomes  
1548 reveals reproducible impacts on plant function. *ISME J* 9: 980–989. DOI: 10.1038/ismej.2014.196
- 1549 Parada A, Needham DM, Fuhrman JA. 2015. Every base matters: assessing small subunit rRNA primers  
1550 for marine microbiomes with mock communities, time-series and global field samples. *Environ Micro-  
1551 biol* 18: 1403–1414. DOI: 10.1111/1462-2920.13023.

**Artificial Selection on Microbiomes to Confer Salt-Tolerance to Plants**

Mueller et al, bioRxiv, Draft 8Nov2019; please email comments to: umueller@austin.utexas.edu

- 1552 Priest HD, Fox SE, Rowley ER, Murray JR, Michael TP, Mockler TC. 2014. Analysis of global gene ex-  
1553 pression in *Brachypodium distachyon* reveals extensive network plasticity in response to abiotic stress.  
1554 *PLoS One* 9: e87499. DOI: 10.1371/journal.pone.0087499
- 1555 Scheuring I, Yu DW. 2012. How to assemble a beneficial microbiome in three easy steps. *Ecol Lett* 15:  
1556 1300–1307. DOI: 10.1111/j.1461-0248.2012.01853.x
- 1557 Swenson W, Wilson DS, Elias R. 2000. Artificial ecosystem selection. *Proc Natl Acad Sci USA* 97: 9110–  
1558 9114. DOI: 10.1073/pnas.150237597
- 1559 Vogel JP, Garvin DF, Leong O, Hayden DM 2006. Agrobacterium-mediated transformation and inbred line  
1560 development in the model grass *Brachypodium distachyon*. *Plant Cell, Tissue & Organ Culture* 84: 199-  
1561 211. DOI: 10.1007/s11240-005-9023-9
- 1562 Vogel J, Bragg J. 2009. *Brachypodium distachyon*, a new model for the Triticeae. In *Genetics and Genomics*  
1563 *of the Triticeae*, pp. 427–449. Edited by GJ Muehlbauer & C Feuillet. New York: Springer.
